# Supplementary material
Source: PubMed Central journal article supplement (PMC1538557)

**Supplementary Figure S3. Replication origin activation profiles for all chromosomes (I – XVI) in wild-type, *mec1-1* and *rad53-1* cells.** Chromosomes I-XVI are shown as cartoons at the top of each figure. The distribution of replication origins on the chromosome is indicated by solid black bars. The letter E indicates early-firing origins (Raghuraman *et al*, 2001). Each point on the graph represents the average of three independent experiments. Standard error is indicated by error bars. Significance levels 1 and 2 correspond to one standard deviation and one half of a standard deviation above background, respectively. Negative controls used for normalization are marked by a black square in wild-type profiles. CEOs are indicated by their ARS number in wild-type profiles and are circled in *mec1-1* and/or *rad53-1* profiles.

# Supplementary Figure S3

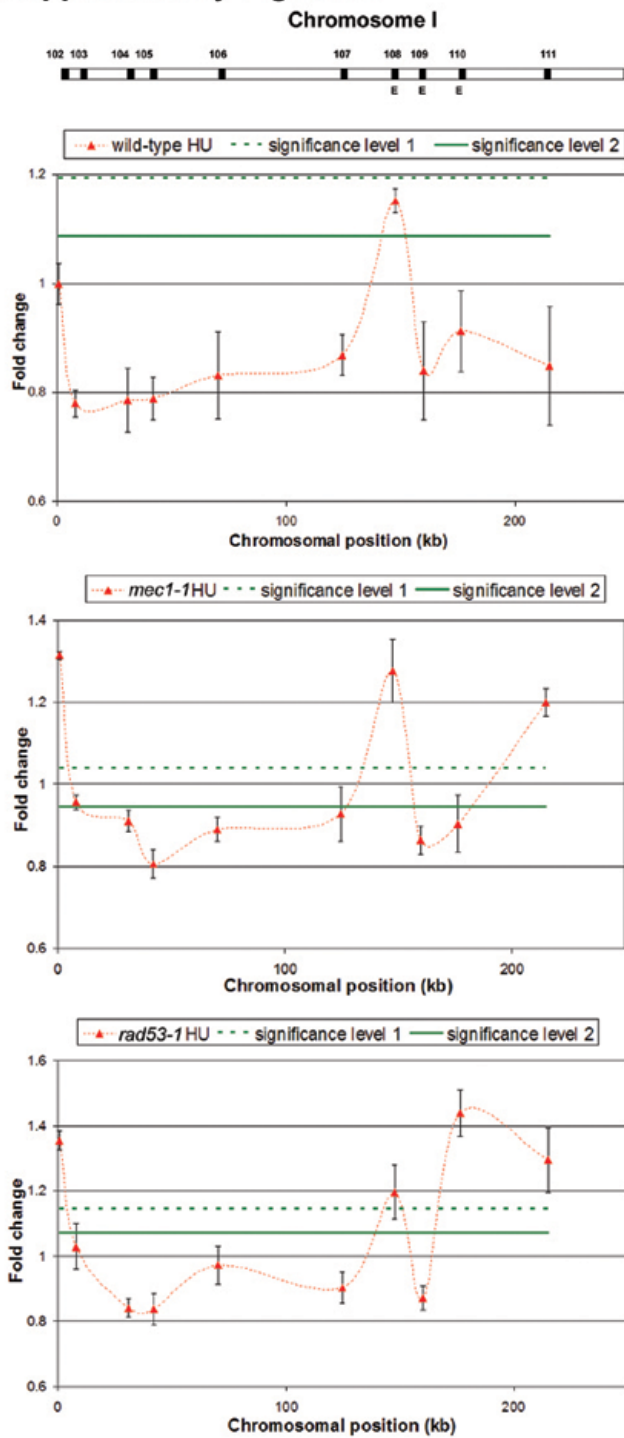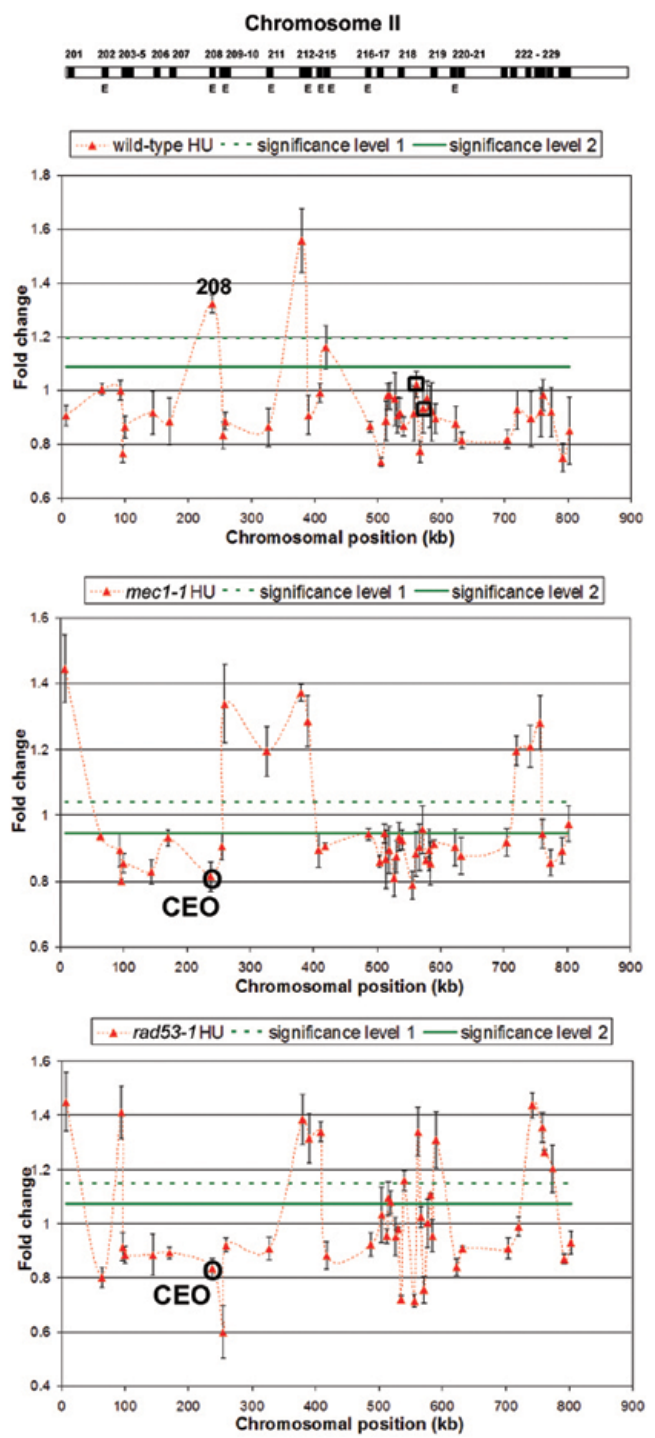

Supplementary Figure S3 (continued from previous page)

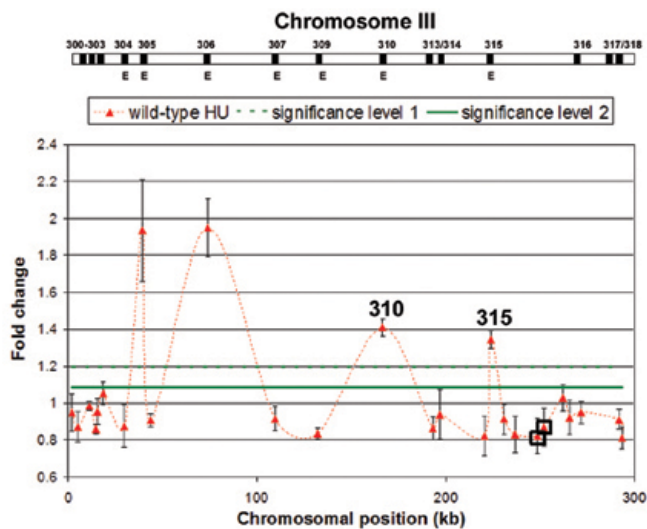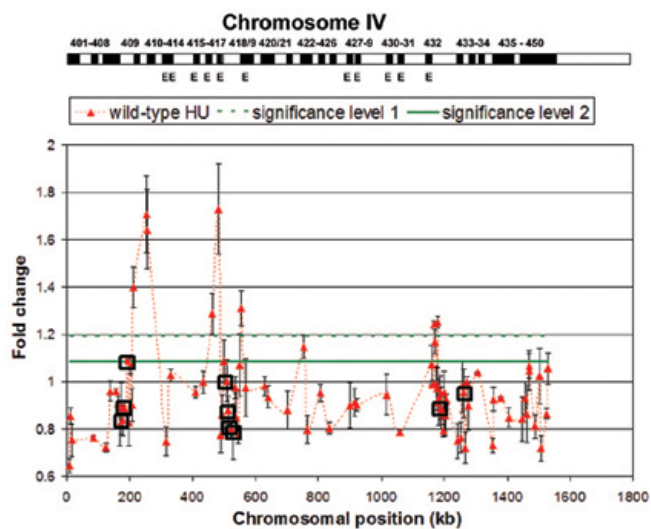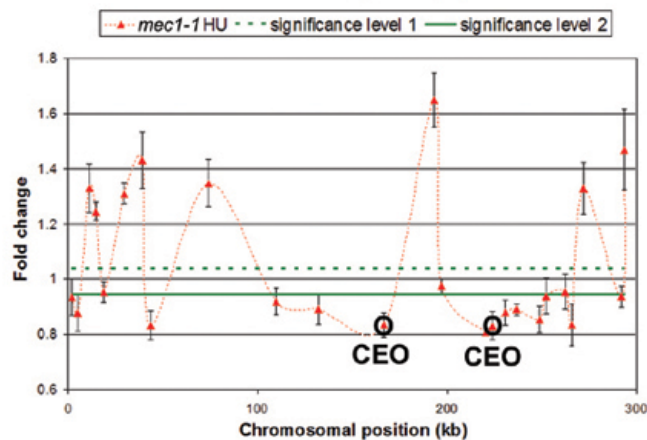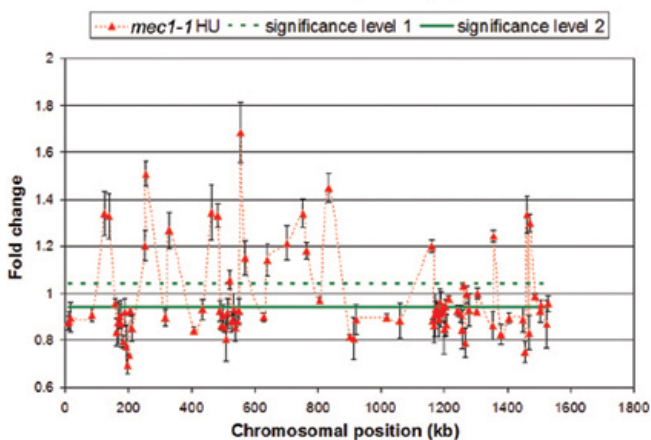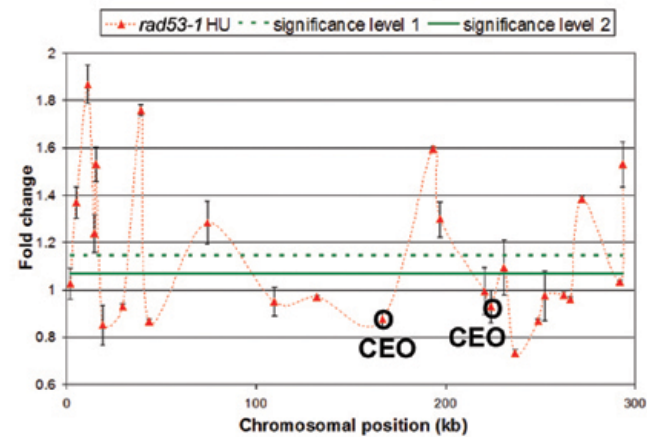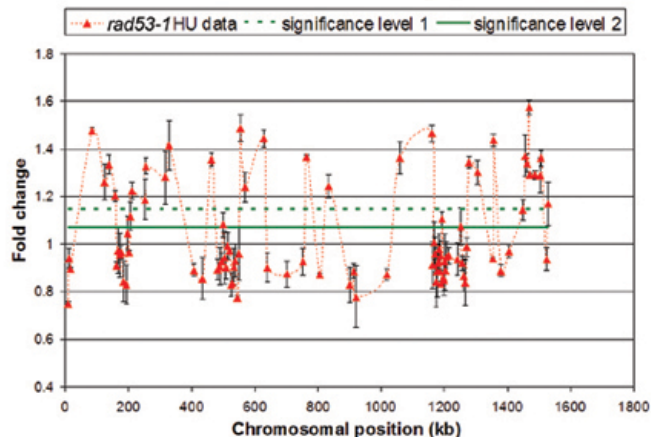

Supplementary Figure S3 (continued from previous page)

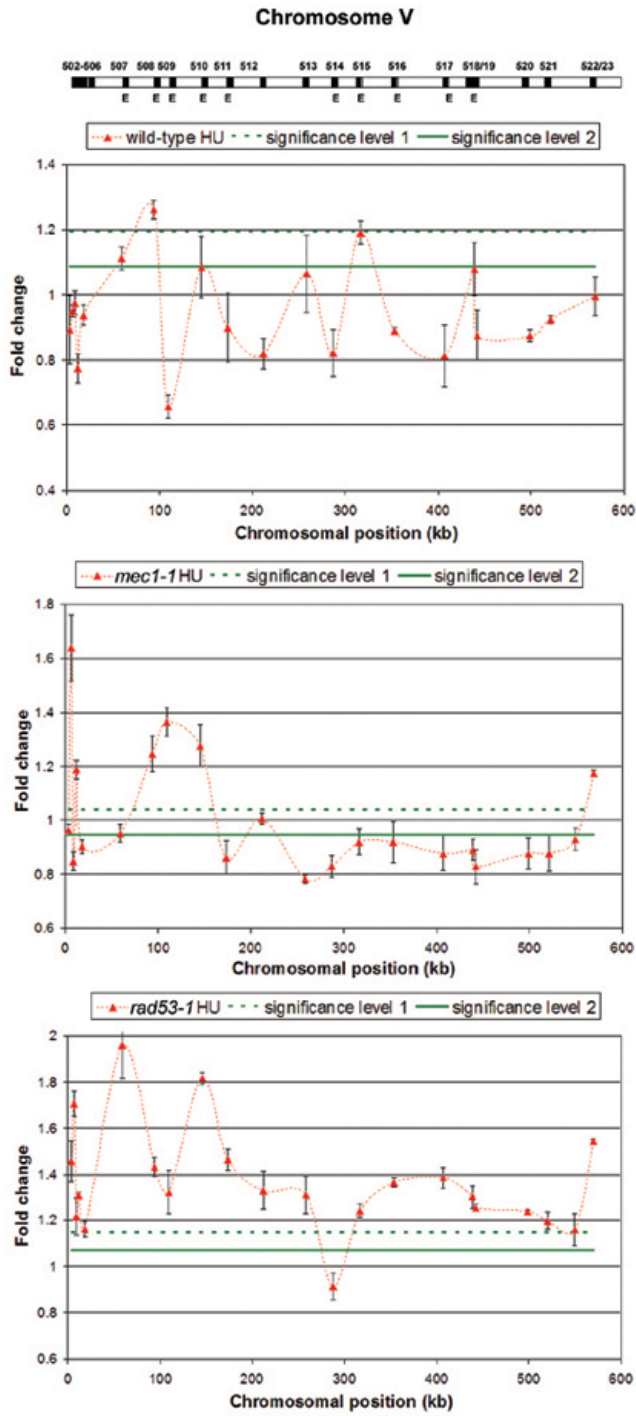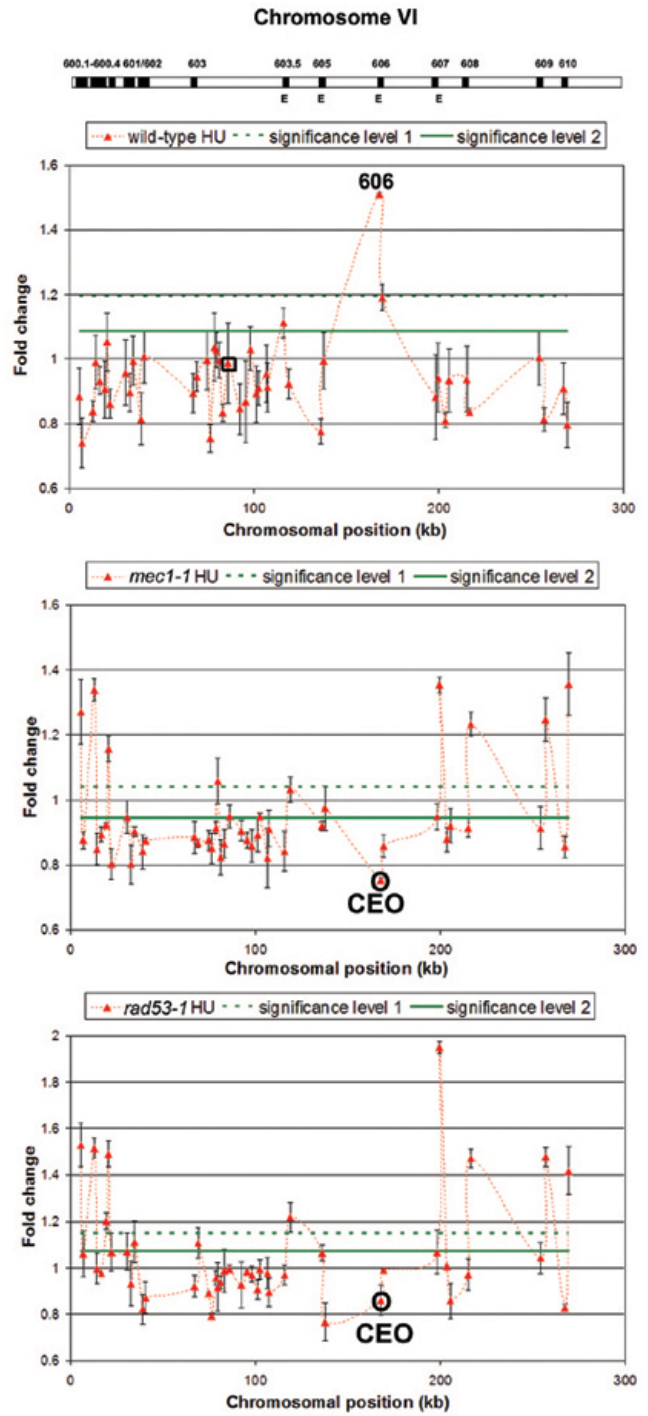

Supplementary Figure S3 (continued from previous page)

Chromosome VII

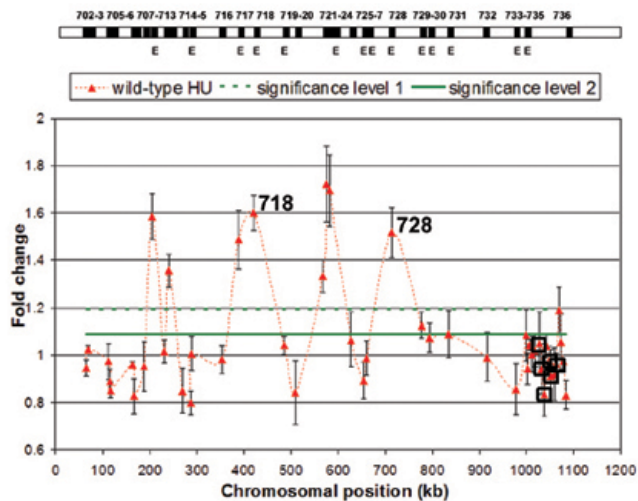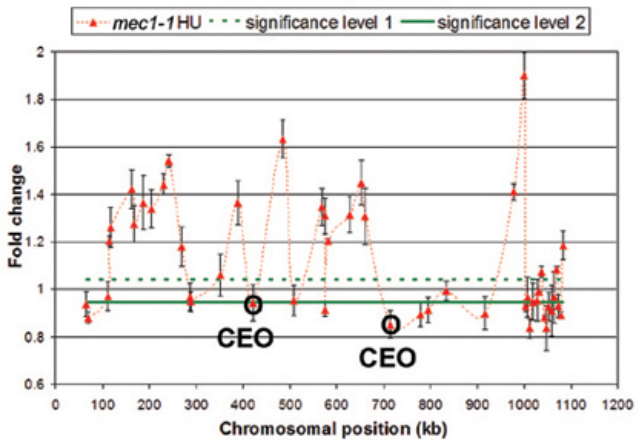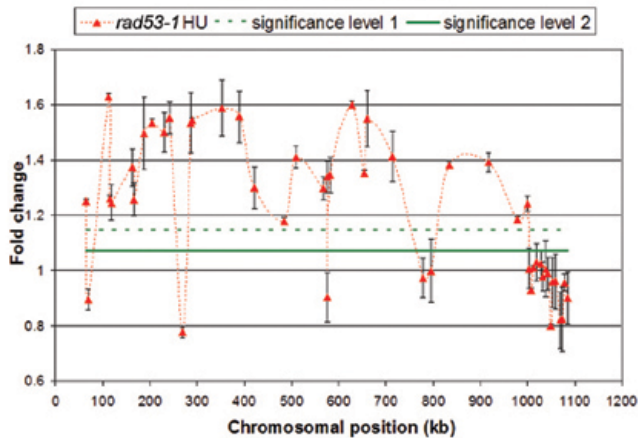

Chromosome VIII

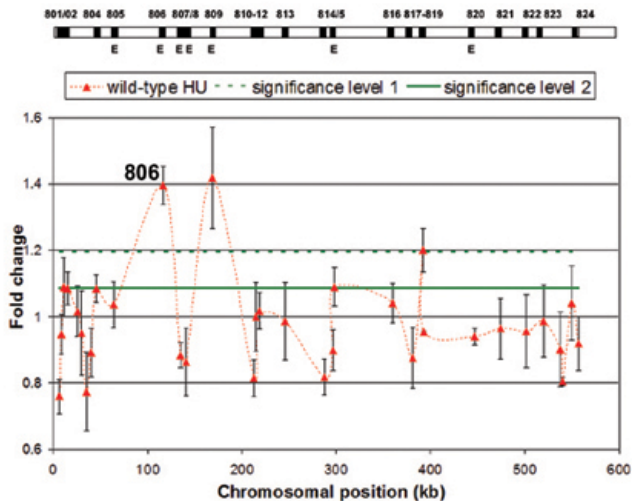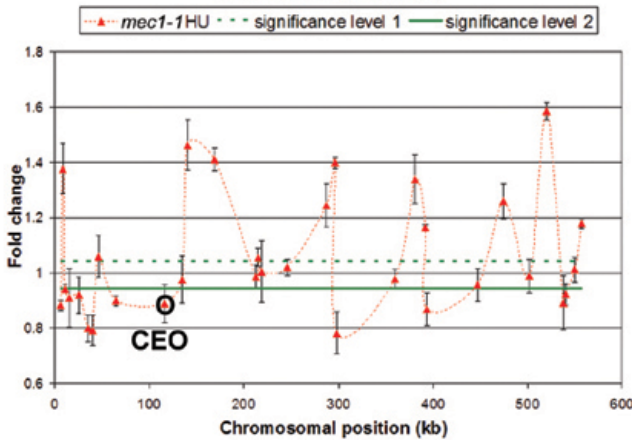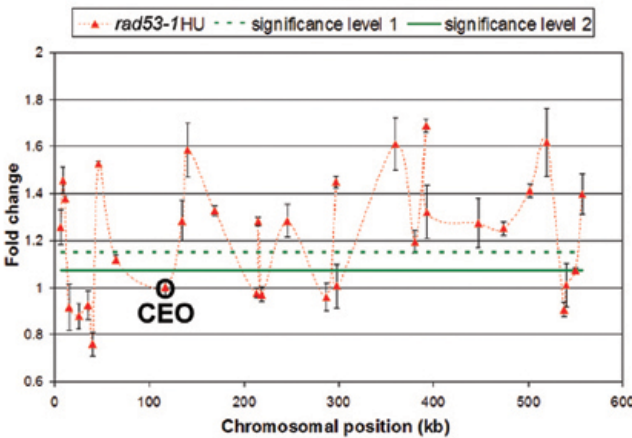

### Supplementary Figure S3 (continued from previous page)

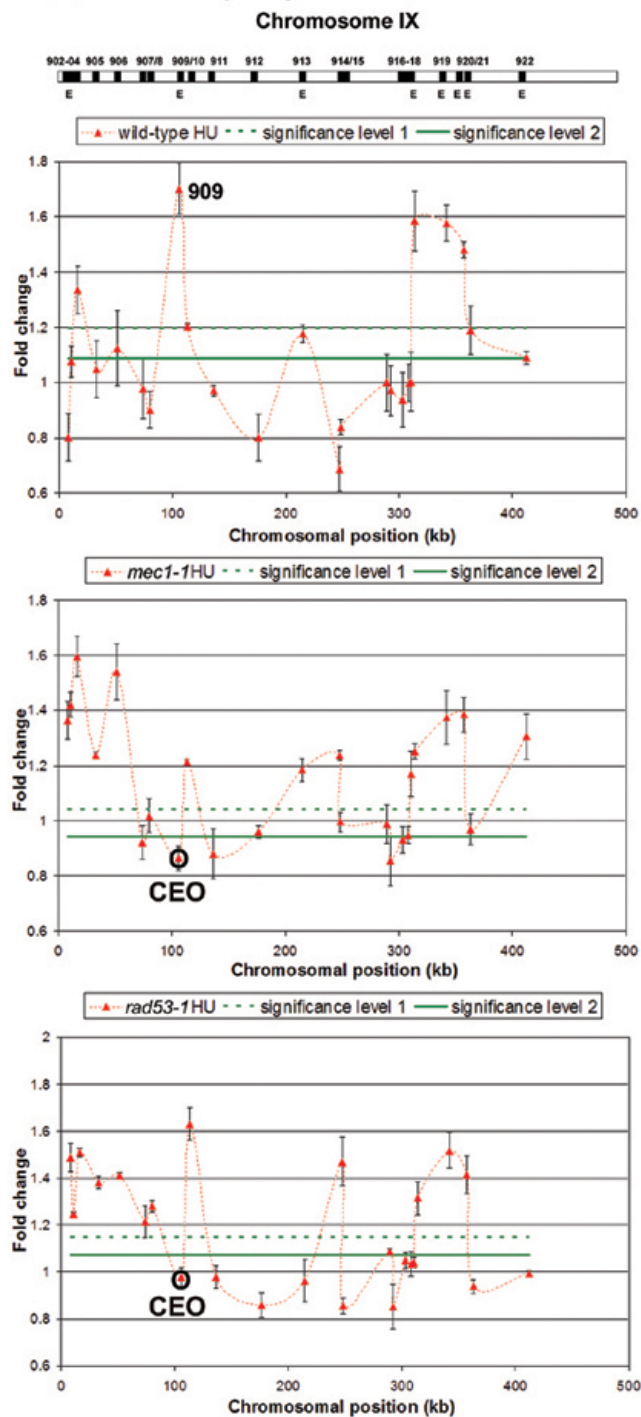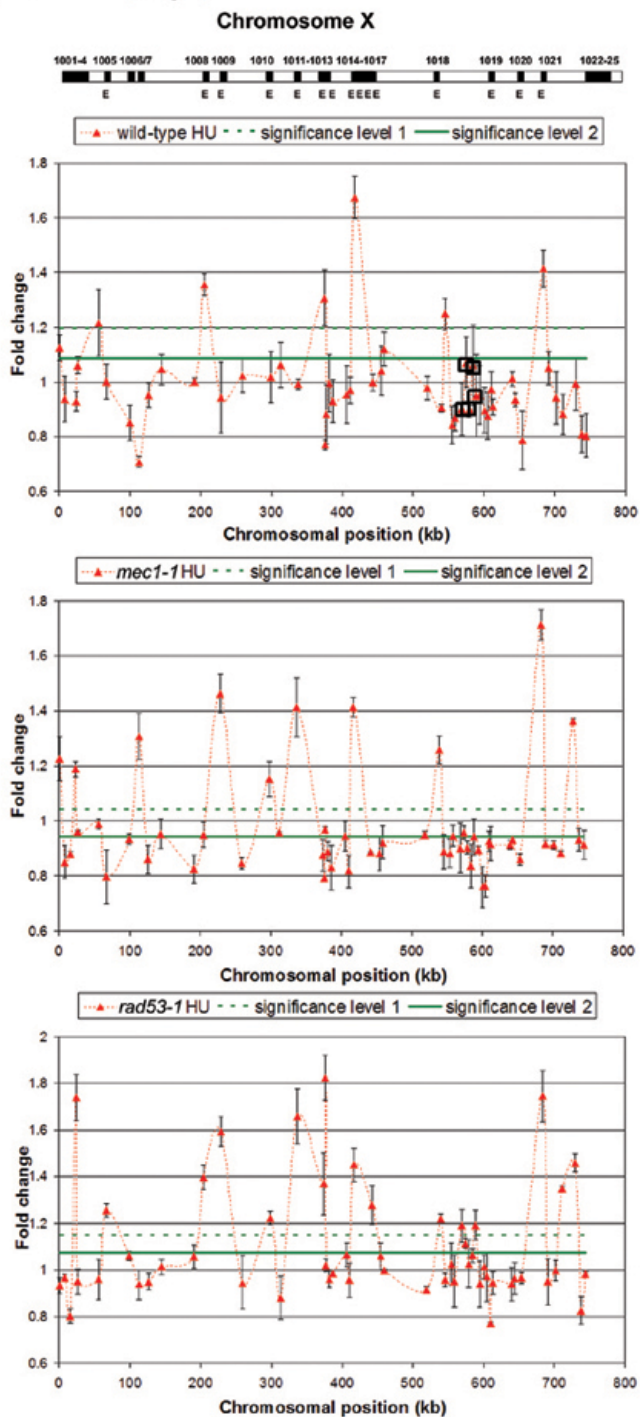

Supplementary Figure S3 (continued from previous page)

Chromosome XI

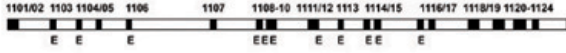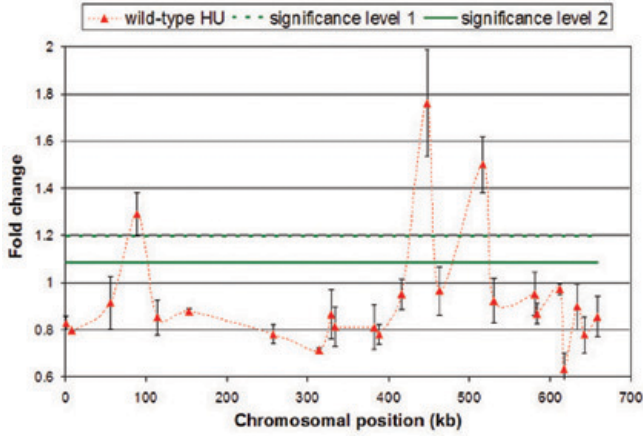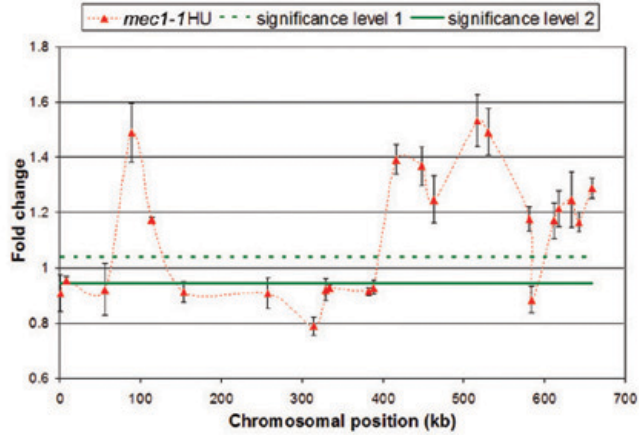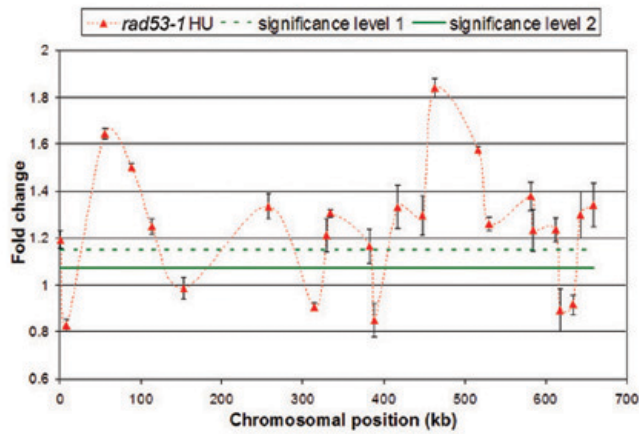

Chromosome XII

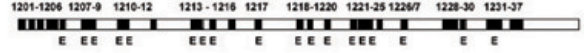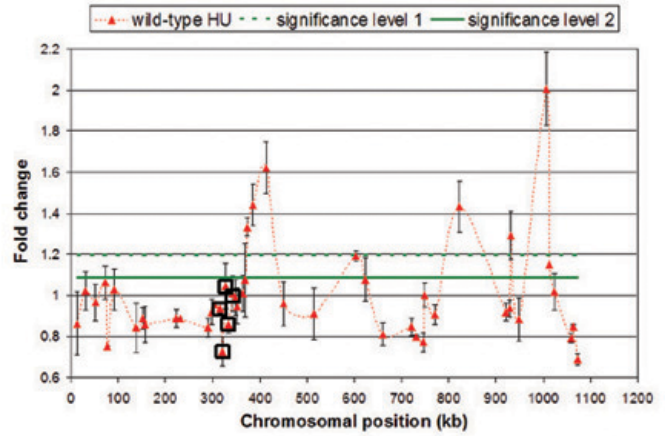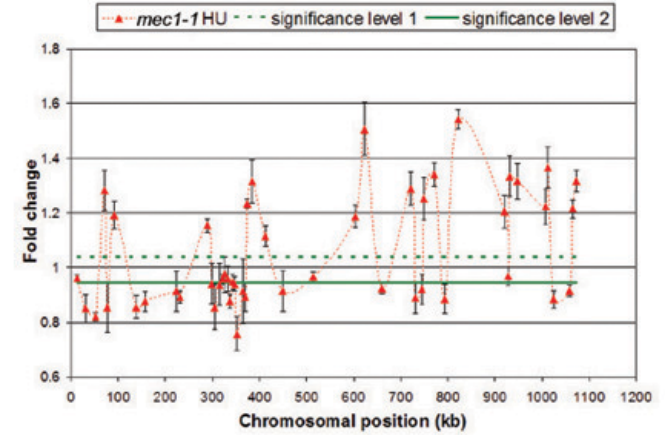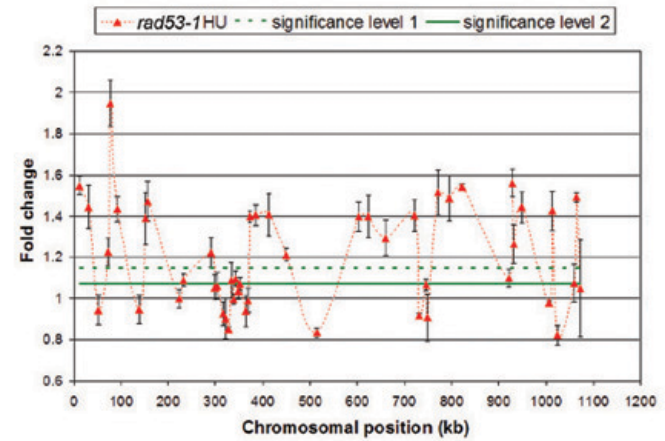

# Supplementary Figure S3 (continued from previous page)

## Chromosome XIII

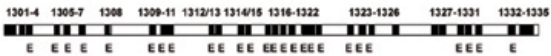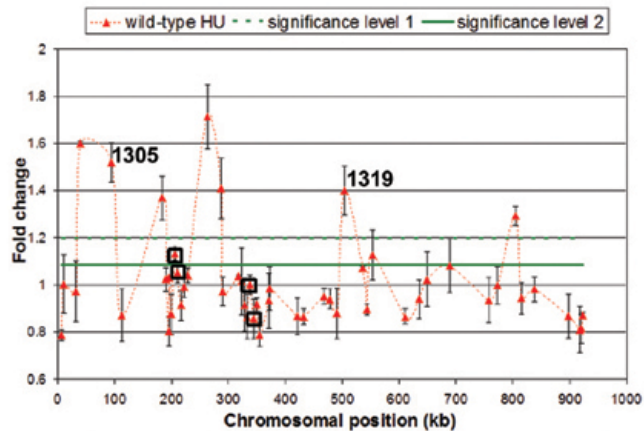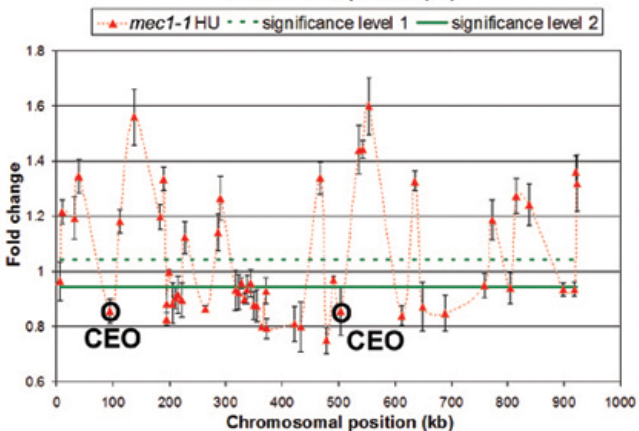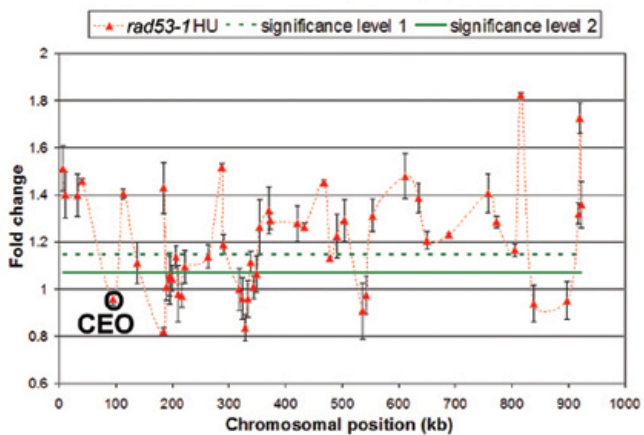

## Chromosome XIV

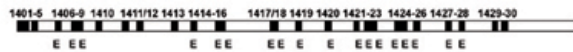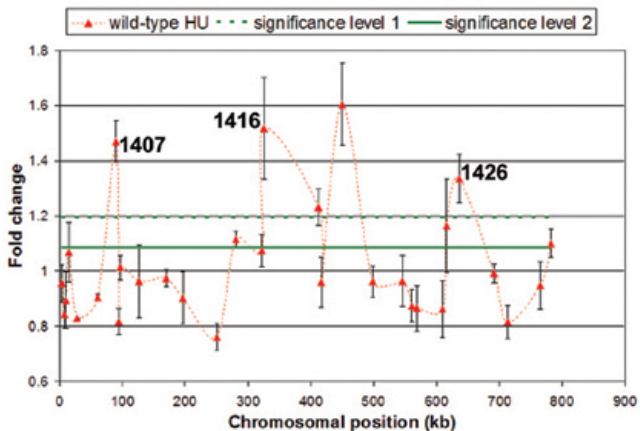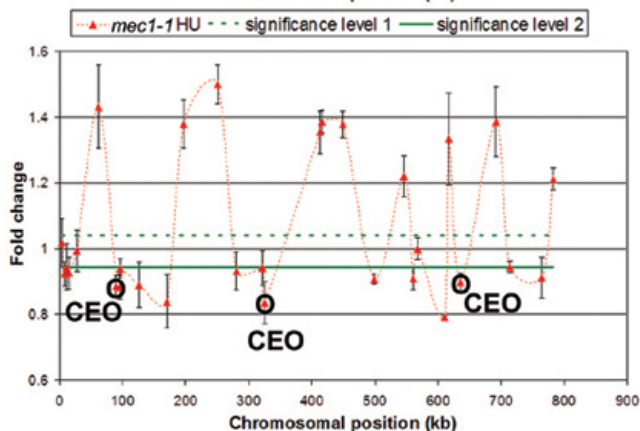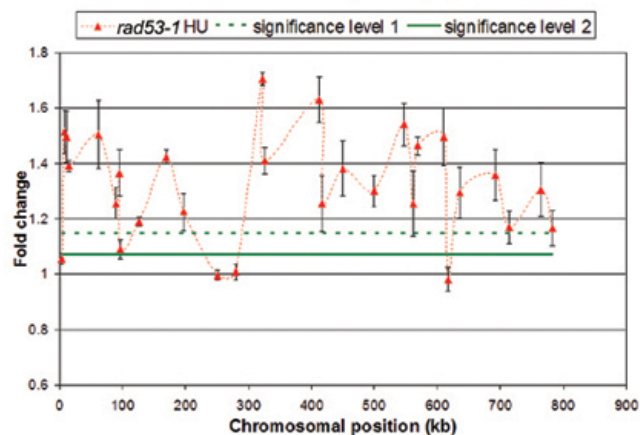



Supplementary Figure S3 (continued from previous page)

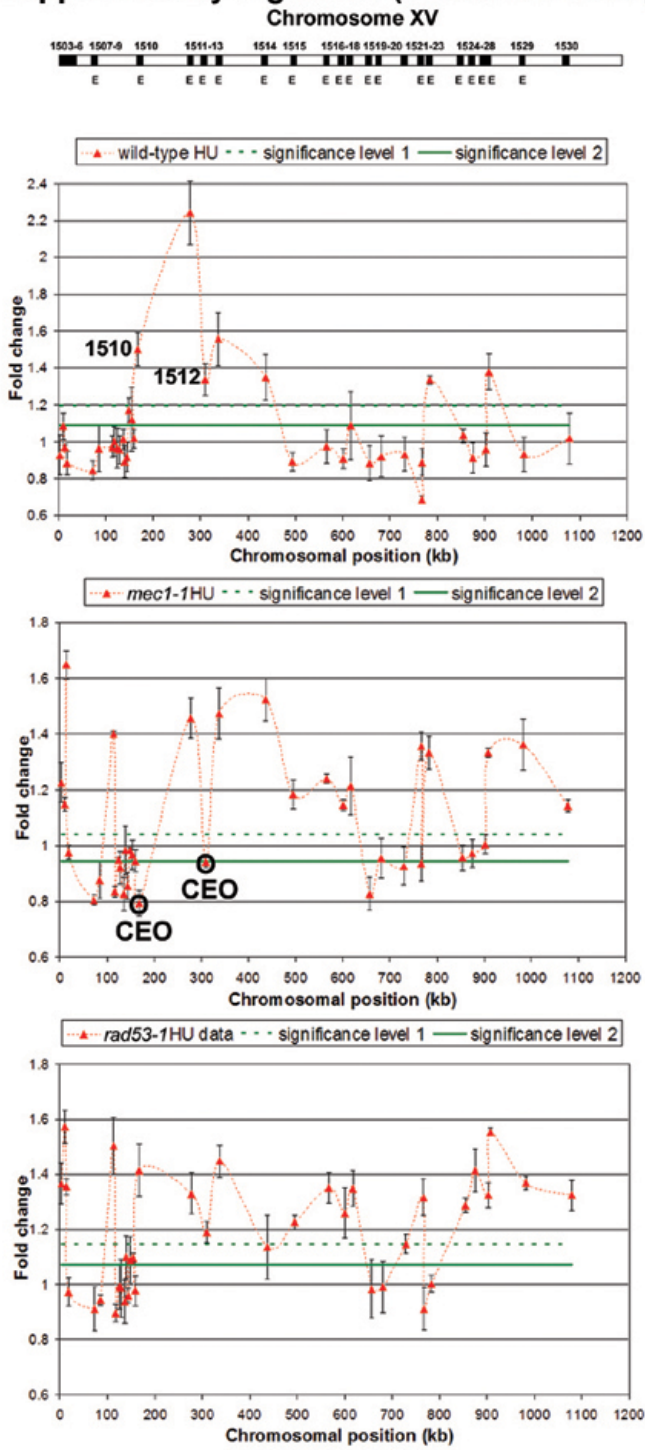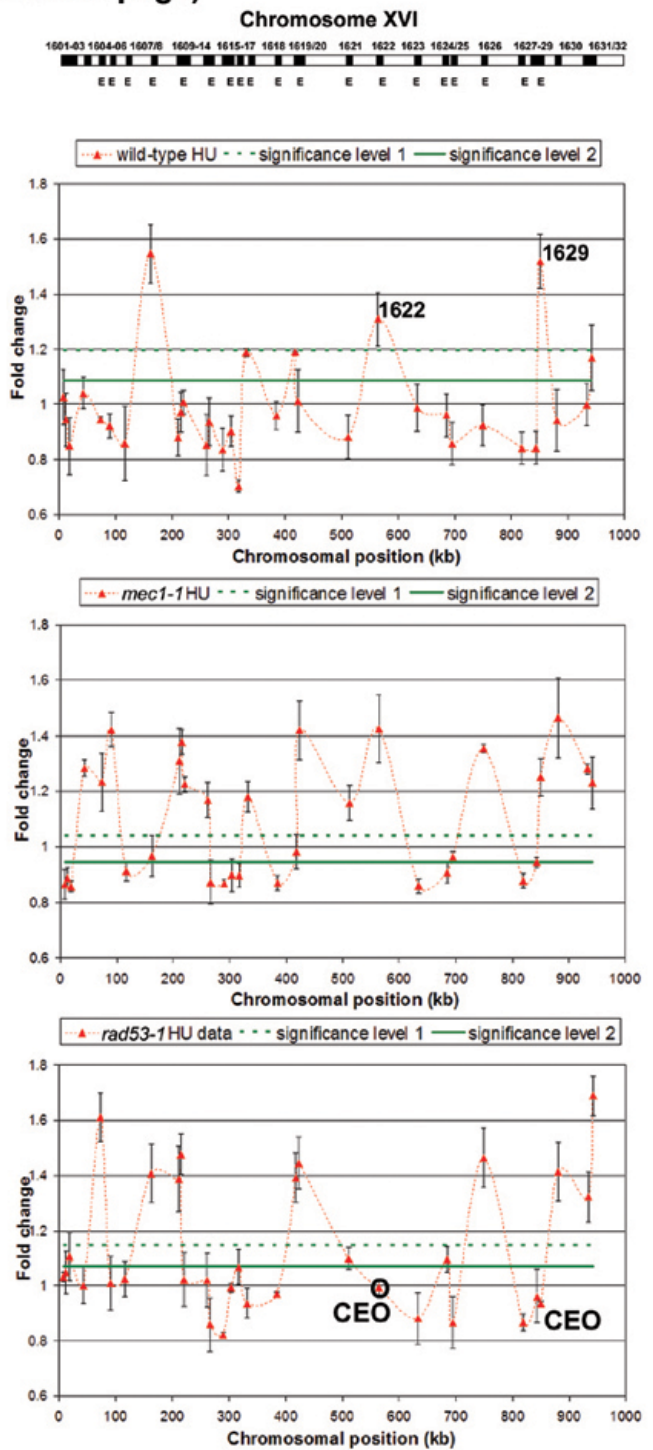

Supplement: 7601251s3.pdf [file 7601251s3.pdf]
