# Supplementary material
Source: PubMed Central journal article supplement (PMC1538557)

**Supplementary Figure S6. Analysis of chromosome fragility in G1- and S- phase arrested cells.** LMPCR analysis of DSBs in wild-type, *mec1-1sml1* $\Delta$  and *rad53-1* cells (in the presence and absence of Rad52) arrested in G1-phase in the presence of  $\alpha$  factor (A) or in S-phase in the presence of 0.2 M HU (B). (C) Analysis of DSBs in *sml1* $\Delta$ , *mec1-1sml1* $\Delta$  and *rad53-1 sml1* $\Delta$  cells arrested in G1 (G1) or S phase (S). LMPCR analysis was performed as described in Figure 8. Results are shown for an early-firing origin, *ARS305* and the CEO, *ARS310*.

Supplementary Figure S6

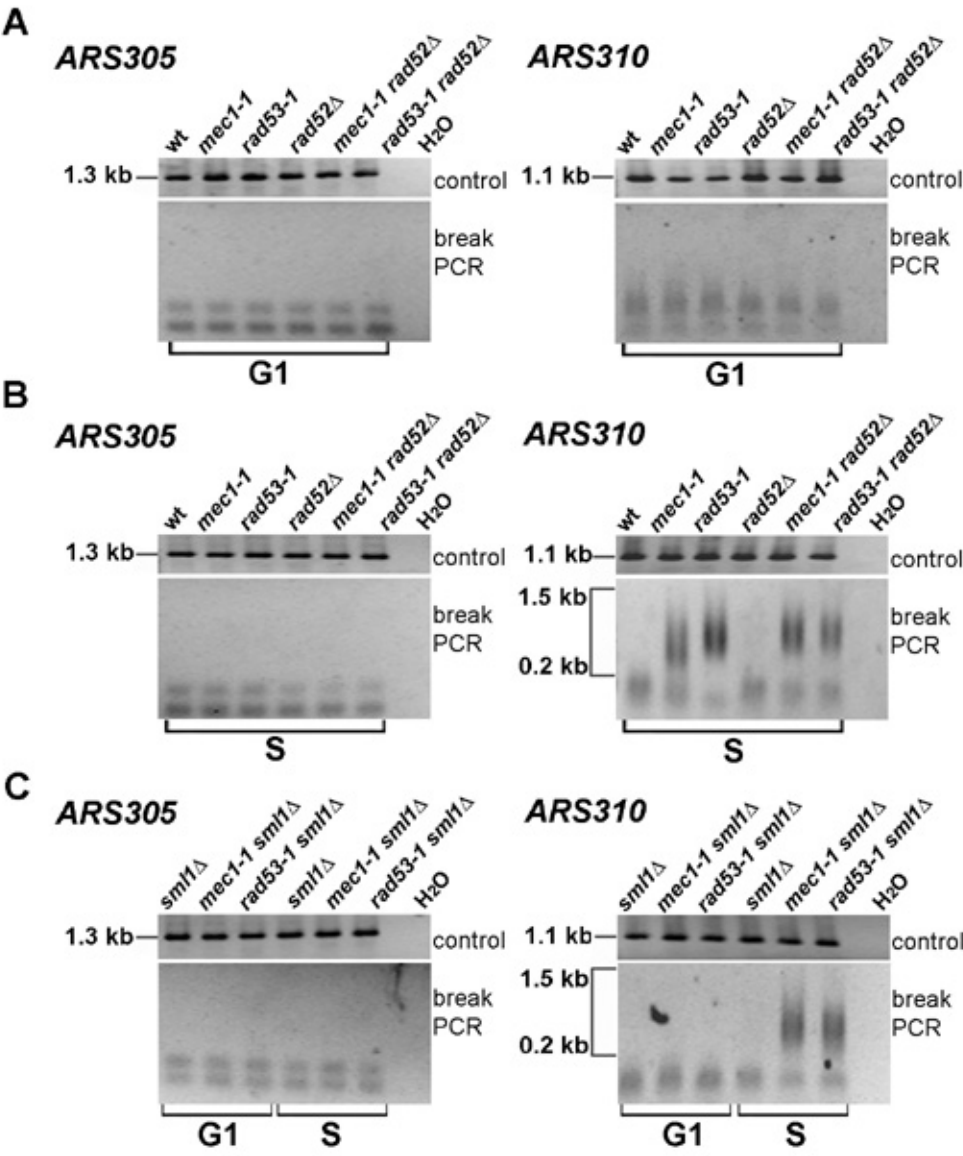

Supplement: 7601251s6.pdf [file 7601251s6.pdf]
