# Supplementary material
Source: PubMed Central journal article supplement (PMC1538557)

**Supplementary Figure S7. Replication profile of wild-type chromosome XIII from a copy number experiment using sonicated DNA.** The same DNA sample that was used in the copy number change experiment described in Sup. Fig. S1B was sonicated to a size range of 0.5 to 1.5 kb. These shorter DNA fragments were then labeled and hybridized to the replication origin array. The resulting profiles, shown here for chromosome XIII, did not show any significant peaks (fold change above significance level 1 and p-value < 0.05). The profiles resembled the plots from the “alpha vs. alpha” control experiment, indicating that short DNA fragments do not hybridize as efficiently as longer fragments to our array. This may be a major difference between our array and high-density oligonucleotide arrays.

# Supplementary Figure S7

## Chromosome XIII

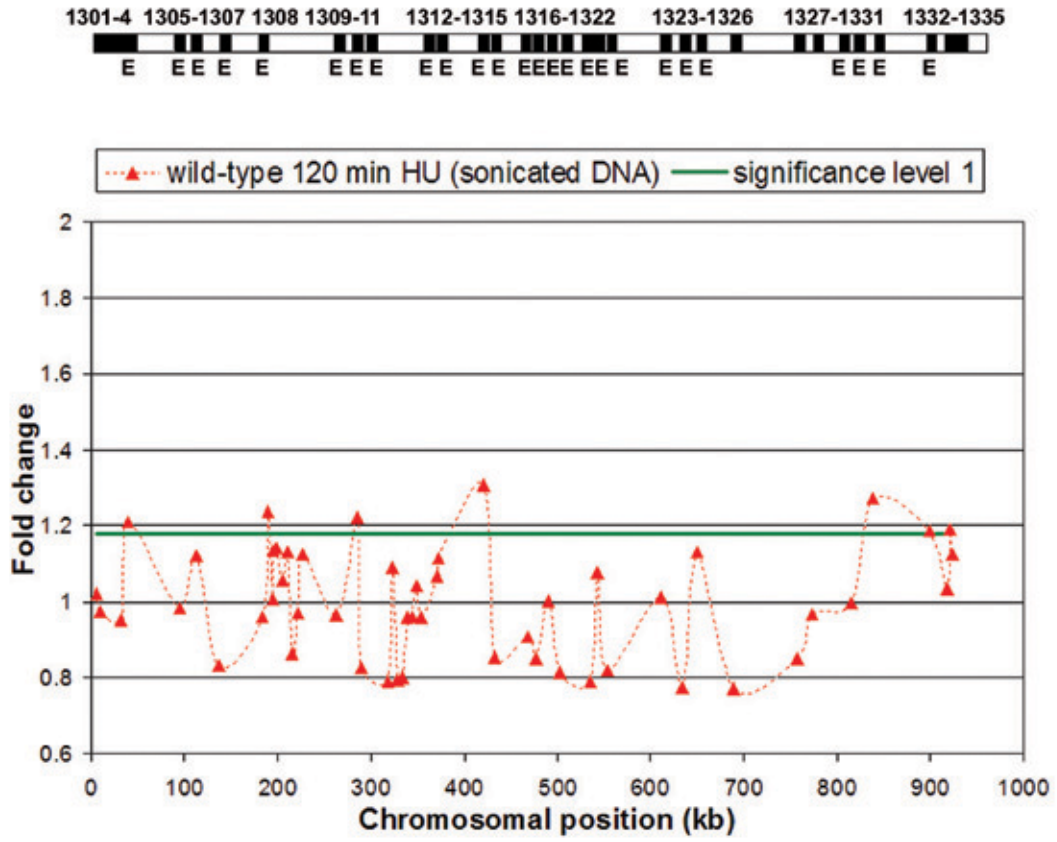

Supplement: 7601251s7.pdf [file 7601251s7.pdf]
