# Supplementary material
Source: PubMed Central journal article supplement (PMC1538557)
Supplement: 7601251s8.pdf [file 7601251s8.pdf]

## Supplementary Data

### Experimental Procedures

#### *Replication origin arrays*

The replication origin array used in this study was designed in our laboratory. The array contained 623 loci that were spotted on poly-L-lysine coated glass slides. Spots represent 424 ORC/MCM binding sites (pro-ARSs) that were identified in the genome-wide study by Wyrick et al. (2001). In addition, there were 195 origin flanking regions, which include 36 negative controls that were used for normalization, as well as 4 additional controls (described below). The origin flanking regions are sites located at 5 kb intervals between two adjacent ORC binding sites that are at least 40 kb apart. The 36 negative controls used for normalization are sites that showed no ORC/MCM binding and are located >20 kb away from an ORC/MCM binding site (see Sup. Table I). The respective DNA fragments were all amplified from yeast genomic DNA (ResGen Invitrogen) and verified by agarose gel electrophoresis, followed by ethidium bromide staining. The primers for amplification are described in Wyrick et al. (2001) and were synthesized by Integrated DNA Technologies. Sup. Table I contains the details of the replication origin array features. The array also contains 4 *Arabidopsis* genes, Arab\_F7H2.16, Arab\_T16B5.5, Arab\_F6D8.11 and Arab\_T1N6.24 (gift from J. Berman) that were each spotted in triplicate. The arrays were post-processed as described in DeRisi et al. (1997).

### *Yeast strains and culture*

All strains are derivatives of BF264-15DU *MATa ade1 his2 leu2-3, 112 trp1-1<sup>ura3</sup> Δns* (Richardson *et al*, 1989) and the genotypes are DCY1671, *MATa bar1Δ ura3::HIS3:GFP:TUB1(URA3)*; DCY1793, *MATa bar1Δ ura3::HIS3:GFP:TUB1(URA3) rad53-1*; DCY2563, *MATa bar1Δ ura3::HIS3:GFP:TUB1(URA3) leu2 mec1-1 sml1Δ*. *RAD52* was deleted using the *LEU2* marker in the above strains by PCR-mediated gene disruption (YB126, DCY1671 *rad52::leu2*; YB127, DCY1793 *rad52::leu2*; YB133, DCY2563 *rad52::leu2*). *SML1* was deleted using the *LEU2* marker as above (YB194, DCY1671 *sml1::leu2*; YB195, DCY1793 *sml1::leu2*). *MCM10* was Myc-tagged using nine Myc epitopes (*TRP1*) (YB231, DCY1671 *MCM10-9MYC*; YB232, DCY2563 *MCM10-9MYC*; YB233, DCY1793 *MCM10-9MYC*). *ARS315* was replaced by the *TRP1* marker (YB204, DCY1671 *ARS315::trp1*; YB205, DCY1793 *ARS315::trp1*; YB206, DCY2563 *ARS315::trp1*) and *RAD52* was deleted in these strains as described above (YB207, YB204 *rad52::leu2*; YB208, YB205 *rad52::leu2*; YB209, YB206 *rad52::leu2*). An extra copy of *ARS315* (inserted into pRS306) was integrated into the *URA3* locus in wild-type, *rad53-1* and *mec1-1* strains derived from the same background but lacking the *GFP-TUB1* construct (YB234, DCY1180 *pRS306+ARS315::ura3*; YB235, DCY1768 *pRS306+ARS315::ura3*; YB236, DCY1808 *pRS306+ARS315::ura3*). *RAD52* was deleted in these strains using the *LEU2* marker (YB237, YB234 *rad52::leu2*; YB238, YB235 *rad52::leu2*; YB239, YB236 *rad52::leu2*) and *MCM10* was Myc-tagged in these strains as described earlier (YB248, YB234 9Myc-*MCM10*; YB249, YB235 9Myc-*MCM10*; YB250, YB236 9Myc- *MCM10*). Cells were grown at 30°C unless indicated

otherwise. For each experiment, the initial culture was prepared using cells from stocks. Cells were blocked in G1 with  $\alpha$  factor (200 ng/ml) and in S phase with HU as indicated.

#### *FACS analysis and fluorescence microscopy*

Fluorescence microscopy and flow cytometry was carried out as described (Clarke *et al* 2001) for each copy number change experiment. G1-arrested cells were released into HU and aliquots were taken every 5 min for FACS analysis and fluorescence microscopy. Cells were scored using a Zeiss Axioplan II microscope with a DIC Plan Fluor 63x/1.4 objective and Endow GFP filter set Chroma 41017. Spindle microtubules were detected by expression of a protein fusion between GFP and Tub1, the major alpha tubulin. The number of budded cells and short (1-3  $\mu$ m) or long (>3  $\mu$ m) spindles were counted for ~300 cells without fixation. Cell cycle progression was verified for all arrest-release experiments using flow cytometry (data not shown).

#### *DNA isolation and labeling of DNA with fluorescent nucleotides*

DNA was isolated using CsCl gradients as described (Bielinsky & Gerbi, 1999). The isolated DNA was partially digested with DpnII (NEB) to yield fragments between 0.5 – 5 kb. The digested DNA was then labeled with either fluorescent Cy5- or Cy3-conjugated dUTP (Amersham Biosciences) using the Bioprime DNA Labeling System (Invitrogen) as described in Pollack *et al.* (2001) except for the following changes. For each labeling reaction, 2  $\mu$ g of DNA was used as template and the reaction was carried out for 2 hr at 37°C. Following the labeling, the sample was purified using the QIAQuick PCR purification kit (Qiagen). The entire labeling reaction was used for each

hybridization experiment. For copy number change experiments, DNA isolated from  $\alpha$  factor-arrested cells was labeled with Cy3 and DNA isolated from HU-arrested cells was labeled with Cy5. For the “alpha vs. alpha” control experiment, DNA isolated from  $\alpha$  factor-arrested cells was labeled with Cy5 and Cy3 in two separate reactions.

#### *Array hybridization*

The purified and labeled DNA samples were pooled (Cy5-HU and Cy3- $\alpha$  or Cy5- $\alpha$  and Cy3- $\alpha$ ) and 32  $\mu$ g of yeast tRNA (Invitrogen) was added to block non-specific hybridizations. The probes were concentrated using a Microcon-30 filter (Millipore). The volumes of recovered DNA probes were adjusted with dH<sub>2</sub>O, and 20X SSC and 0.1% SDS was added to obtain a final concentration of 3X SSC and 0.1% SDS in the hybridization buffer. The hybridization reaction was boiled for 2 min, and was incubated at 60°C for 5 min before application to the microarray. Hybridizations were carried out at 60°C for 16 hr. The slides were hybridized and washed as described (Pollack *et al*, 2001; DeRisi *et al*, 1997). Copy number change experiments were performed in triplicate.

#### *Data analysis*

The slides were scanned using a Scan Array 5000 scanner (GSI Lumonics) and TIFF images in each channel were obtained. Images were quantified using GenePix Pro 6.0 (Axon Instruments Inc.). Spots with background-subtracted Cy5 and Cy3 median values (obtained from GenePix Pro 6.0) with at least 150 pixel units were considered in the subsequent data analysis. Cy5/Cy3 ratios were normalized using either the 36 negative control regions from *S. cerevisiae* or using the 4 *Arabidopsis* genes, similar to using

house-keeping genes for normalizing expression arrays. The alpha vs. alpha control experiment was used to estimate background variation. P-values were calculated using the Student's t-test by comparing data from HU/alpha and alpha/alpha hybridizations or, in the case of the CEOs, comparing HU/alpha hybridizations among wild-type and mutant cells. A fold change greater than one standard deviation above background (significance level 1) with a p-value < 0.05 was considered significant. The average fold change for each spot was calculated and plotted against the middle of its chromosomal position (kb). Theoretically, ratios should not have a numerical value < 1, however experimental values < 1 have also been observed by others (Pollack *et al*, 2001). Origins activated in wild-type cells (above significance level 1 and a p-value (HU/alpha wild-type vs. mutant) < 0.05) but not in *mec1-1* or *rad53-1* mutants (below significance level 2 – defined as one half of a standard deviation above background and a p-value < 0.05) were classified as CEOs. Primary data will be made available upon request.

#### *Alkaline gel electrophoresis of replicating DNA*

Replication intermediates from wild-type and *rad53-1* cells were analyzed using alkaline agarose gel electrophoresis as described (Diffley & Santocanale, 1998). Cells were grown at 25°C unless indicated otherwise.  $\alpha$  factor-arrested cells were released into S phase in the presence of HU as indicated. 10 ml aliquots were taken in 30-min intervals. A 10 ml aliquot was also removed from the G1-arrested cells as a negative control. Cells were lysed using lyticase, and DNA enriched for replication intermediates was isolated using a partial phenol-chloroform fractionation. For each fractionation, ~400  $\mu$ l of supernatant (which contain all the RI DNA) was removed and the entire sample was

loaded on the alkaline gel. Alkaline gel electrophoresis was carried out for ~16 hr at 20 V. DNA was transferred from gels to Hybond N<sup>+</sup> membranes (Amersham Biosciences) according to the manufacturer's instructions. Origin-specific probes were PCR amplified using primers described in Sup. Table I. These probes were biotinylated using the Bioprime DNA Labeling System (Invitrogen). Southern blots were hybridized and visualized using the North2South Chemiluminescent Hybridization and Detection Kit (Pierce) according to the manufacturer's instructions.

### *2D gel electrophoresis of replication intermediates*

Replication intermediates from wild-type, *mec1-1* and *rad53-1* cells were analyzed using two-dimensional (2D) agarose gel electrophoresis as described (Friedman & Brewer, 1995; Tourrière *et al*, 2005).  $\alpha$  factor-arrested cells were released into S phase in the presence of 0.2 M HU at 30°C. DNA was isolated and cleaved with suitable restriction enzymes as described (Wu & Gilbert, 1995; Tourrière *et al*, 2005). DNA fragments were separated by molecular weight in a 0.4 % agarose gel at ~1 V/cm for 16 – 18 hr. Separation in the second dimension was carried out in a 1.5 % agarose gel at 5 V/cm for ~12 – 15 hr at 4°C. DNA was transferred from gels to Hybond N<sup>+</sup> membranes (Amersham Biosciences) according to the manufacturer's instructions. Origin-specific probes were PCR amplified (primer sequences available upon request) and labeled with  $\alpha$ -P32-dATP (MP) using the RediPrimeII Kit (Stratagene). Blots were hybridized using PerfectHybPlus hybridization buffer (Sigma) and detected on a PhosphorImager (Fujifilm FLA500).

### *Linker-mediated PCR analysis of DNA breaks*

The presence of DNA breaks adjacent to replication origins was tested using a two-step linker-mediated PCR method. Genomic DNA was isolated from cells grown in the absence of HU, unless otherwise stated. A linker was ligated to 500 ng – 1  $\mu$ g of double-stranded DNA (Mueller & Wold, 1989), after conducting a fill-in reaction to yield blunt DNA ends as described (Ren *et al*, 2001). PCR was carried out under standard conditions except for the following changes. 30 - 60 ng of linker-ligated DNA was amplified by a 25-cycle PCR reaction (94 °C 2'; 25 X [94 °C 30", 55 °C 30", 72 °C 2']) with one origin-specific and one linker-specific primer. This was followed by a nested 10-cycle PCR reaction (94 °C 2'; 10 X [94 °C 30", 58 °C 30", 72 °C 1:30']) using 5  $\mu$ l of the first PCR reaction as template and a second origin-specific primer and the same linker-specific primer. All primers were used at 30  $\mu$ M (except for the ARS606 primer, which was used at 90  $\mu$ M). PCR fragments were fractionated on agarose gels. In parallel, PCR products were cloned into T-overhang vectors and sequenced to verify specificity. To ensure that all primer pairs worked at equal efficiency, breaks were introduced at specific restriction sites ~ 1 kb downstream of each origin, and tested using the same two-step PCR protocol (10 ng of ligated DNA as template). Restriction enzymes used were PstI (ARS305), TaqI (ARS121), SnaBI (ARS1), PstI (ARS310), HpaII (ARS1305), AccI (ARS315), DraI (ARS606) and BglII (ARS315 in URA3). All enzymes were obtained from NEB. Primer sequences are available upon request.

## Supplementary References

- Bielinsky AK, Gerbi SA (1999) Chromosomal ARS1 has a single leading strand start site. *Mol Cell* **3**: 477-486
- Clarke DJ, Segal M, Jensen S, Reed SI (2001) Mec1p regulates Pds1p levels in S phase, complex coordination of DNA replication and mitosis. *Nat Cell Biol* **3**: 619-627
- DeRisi JL, Iyer VR, Brown PO (1997) Exploring the metabolic and genetic control of gene expression on a genomic scale. *Science* **278**: 680-686
- Friedman KL, Brewer BJ (1995) Analysis of replication intermediates by two-dimensional agarose gel electrophoresis. *Methods Enzymol* **262**: 613-627
- Mueller PR, Wold B (1989) In vivo footprinting of a muscle specific enhancer by ligation mediated PCR. *Science* **246**:780-6
- Pollack JR, Perou CM, Alizadeh AA, Eisen MB, Pergamenschikov A, Williams CF, Jeffrey SS, Botstein D, Brown PO (1999) Genome-wide analysis of DNA copy-number changes using cDNA microarrays. *Nat Genet* **23**: 41-46
- Raghuraman MK, Winzeler EA, Collingwood D, Hunt S, Wodicka L, Conway A, Lockhart DJ, Davis RW, Brewer BJ, Fangman WL (2001) Replication dynamics of the yeast genome. *Science* **294**: 115-121
- Ren B, Robert F, Wyrick JJ, Aparicio O, Jennings EG, Simon I, Zeitlinger J, Schreiber J, Hannett N, Kanin E, Volkert TL, Wilson CJ, Bell SP, Young RA (2000) Genome-wide location and function of DNA binding proteins. *Science* **290**: 2306-9
- Richardson HE, Wittenberg C, Cross F, Reed SI (1989) An essential G1 function for cyclin-like proteins in yeast. *Cell* **59**: 1127-1133



- Santocanale C, Diffley JF (1998) A Mec1- and Rad53-dependent checkpoint controls late-firing origins of DNA replication. *Nature* **395**: 615-618
- Shimada K, Pasero P, Gasser SM (2002) ORC and the intra-S-phase checkpoint: a threshold regulates Rad53p activation in S phase. *Genes & Dev* **16**: 3236-3252
- Straight AF, Marshall WF, Sedat JW, Murray AW (1997) Mitosis in living budding yeast: anaphase A but no metaphase plate. *Science* **277**: 574-578
- Tourrière H, Versini G, Cordon-Preciado V, Alabert C, Pasero P (2005) Mrc1 and Tof1 promote replication fork progression and recovery independently of Rad53. *Mol Cell* **19**: 699-706
- Wu JR, Gilbert DM (1995) Rapid DNA preparation for 2D gel analysis of replication intermediates. *Nucleic Acids Res* **23**: 3997-3998
- Wyrick JJ, Aparicio JG, Chen T, Barnett JD, Jennings EG, Young RA, Bell SP, Aparicio OM (2001) Genome-wide distribution of ORC and MCM proteins in *S. cerevisiae*, high-resolution mapping of replication origins. *Science* **294**: 2357-2360
- Yabuki N, Terashima H, Kitada K (2002) Mapping of early firing origins on a replication profile of budding yeast. *Genes Cells* **7**: 781-789

**Supplementary Table I.** Details of replication origin array loci.

| <b>Gene ID</b> | <b>proARS/<br/>Inter-origin locus<sup>a</sup></b> | <b>Chr</b> | <b>Start<br/>(bp)</b> | <b>End<br/>(bp)</b> |
|----------------|---------------------------------------------------|------------|-----------------------|---------------------|
| YAL069W        | 102                                               | I          | 335                   | 649                 |
| YAL067C        | 103                                               | I          | 7475                  | 8538                |
| iYAL063C-2     | 104                                               | I          | 30371                 | 31573               |
| iYAL056W       | 105                                               | I          | 41808                 | 42182               |
| iYAL039C-0     | 106                                               | I          | 69532                 | 70662               |
| iYAL017W       | 107                                               | I          | 124299                | 124883              |
| iYAL002W       | 108                                               | I          | 147533                | 147596              |
| iYAR008W       | 109(101)                                          | I          | 159794                | 160106              |
| iYAR019C-1     | 110(ADE1)                                         | I          | 175994                | 176855              |
| iYARCdelta8-3  | 111                                               | I          | 214197                | 215673              |
| iYBL109W-0     | 201                                               | II         | 6125                  | 7151                |
| iYBL086C       | 202                                               | II         | 62592                 | 63866               |
| iYBL068W       | 203                                               | II         | 93389                 | 93811               |
| iYBL067C       | 204                                               | II         | 95877                 | 96900               |
| iYBL065W       | 205                                               | II         | 100265                | 100329              |
| iYBL040C       | 206                                               | II         | 142827                | 143948              |
| iYBL027W       | 207                                               | II         | 169335                | 170582              |
| iYBL001C       | 208                                               | II         | 237425                | 238165              |
| iYBR008C       | 209(H4)                                           | II         | 254166                | 255327              |
| iYBRCDelta11   | 210                                               | II         | 258930                | 259101              |
| iYBR044C       | 211                                               | II         | 326016                | 326749              |
| YBR070C        | 212                                               | II         | 379180                | 379871              |
| iYBR075W       | 213                                               | II         | 389171                | 390329              |
| iYBR082C-0     | 214                                               | II         | 407123                | 408123              |
| iYBR085W-0     | 215                                               | II         | 416860                | 417958              |
| iYBR124W       | 216                                               | II         | 486820                | 487153              |
| YBR134W        | 217                                               | II         | 504201                | 504602              |
| YBR136W        | Late/Late                                         | II         | 511722                | 512665              |
| YBR138C        | Late/Late                                         | II         | 515295                | 513721              |
| YBR140C        | Late/Late                                         | II         | 517910                | 518955              |
| iYBR140C       | Late/Late                                         | II         | 526582                | 526979              |
| iYBR142W       | Late/Late                                         | II         | 530592                | 530823              |
| iYBR145W       | Late/Late                                         | II         | 534771                | 535214              |
| iYBR148W       | 218                                               | II         | 539659                | 539941              |

**Supplementary Table I.** Continued from previous page.

| <b>Gene ID</b>        | <b>proARS/<br/>Inter-origin locus<sup>a</sup></b> | <b>Chr</b> | <b>Start<br/>(bp)</b> | <b>End<br/>(bp)</b> |
|-----------------------|---------------------------------------------------|------------|-----------------------|---------------------|
| iYBR157C-1            | Late/Late                                         | II         | 555382                | 556502              |
| iYBR160W <sup>b</sup> | Late/Late                                         | II         | 560927                | 561588              |
| YBR163W               | Late/Late                                         | II         | 566203                | 567128              |
| iYBR166C <sup>b</sup> | Late/Late                                         | II         | 571154                | 571422              |
| YBR170C               | Late/Late                                         | II         | 578045                | 576303              |
| iYBR172C              | Late/Late                                         | II         | 581476                | 581680              |
| iYBR176W              | Late/Late                                         | II         | 584612                | 584761              |
| YBR180W               | 219                                               | II         | 589749                | 590936              |
| iYBR200W              | 220                                               | II         | 622481                | 623742              |
| iYBR203W              | 221                                               | II         | 631897                | 632209              |
| iYBR241C              | 222                                               | II         | 704010                | 704625              |
| YBR250W               | 223                                               | II         | 719235                | 720218              |
| iYBR268W              | 224                                               | II         | 741573                | 742139              |
| iYBR275C              | 225                                               | II         | 757061                | 757576              |
| iYBR278W              | 226                                               | II         | 760855                | 761213              |
| iYBR284W              | 227                                               | II         | 773588                | 773878              |
| iYBR294W              | 228                                               | II         | 791769                | 792803              |
| iYBR297W              | 229                                               | II         | 801883                | 802585              |
| YCL076W               | 300                                               | III        | 1537                  | 2127                |
| iYCLWomega2-0         | 300.5                                             | III        | 4314                  | 5392                |
| iYCL069W              | 301                                               | III        | 11072                 | 11493               |
| iYCL065W-0            | 302                                               | III        | 14108                 | 14947               |
| iYCL065W-1            | 303/320                                           | III        | 14947                 | 15787               |
| iYCL063W              | FALSE                                             | III        | 18544                 | 18799               |
| iYCL055W-0            | 304                                               | III        | 28919                 | 30175               |
| iYCL050C              | 305                                               | III        | 38777                 | 39763               |
| iYCL048W              | FALSE                                             | III        | 43533                 | 43638               |
| iYCL027W              | 306                                               | III        | 73312                 | 74675               |
| YCL004W               | 307                                               | III        | 108713                | 109963              |
| YCR010C               | 309                                               | III        | 132724                | 131873              |
| iYCR026C              | 310                                               | III        | 166050                | 167084              |
| iYCR036W              | 313                                               | III        | 193027                | 193143              |
| YCR038C               | 314                                               | III        | 197966                | 196350              |
| YCR057C               | FALSE                                             | III        | 221958                | 219187              |

**Supplementary Table I.** Continued from previous page.

| <b>Gene ID</b>        | <b>proARS/<br/>Inter-origin locus<sup>a</sup></b> | <b>Chr</b> | <b>Start<br/>(bp)</b> | <b>End<br/>(bp)</b> |
|-----------------------|---------------------------------------------------|------------|-----------------------|---------------------|
| iYCR060W              | 315                                               | III        | 223463                | 224292              |
| YCR066W               | Early/Late                                        | III        | 230226                | 231689              |
| YCR068W               | Early/Late                                        | III        | 235940                | 237229              |
| iYCR076C <sup>b</sup> | Early/Late                                        | III        | 248768                | 248961              |
| YCR079W <sup>b</sup>  | Early/Late                                        | III        | 251571                | 252878              |
| YCR086W               | Early/Late                                        | III        | 262115                | 262687              |
| iYCR088W              | Early/Late                                        | III        | 265569                | 266157              |
| iYCR090C-0            | 316                                               | III        | 271586                | 272356              |
| YCR096C               | 317                                               | III        | 292260                | 291901              |
| iYCR097W              | 318                                               | III        | 293043                | 293725              |
| iYDL247W              | 401                                               | IV         | 7814                  | 8683                |
| iYDL246C-1            | 402                                               | IV         | 10706                 | 11657               |
| iYDL245C-1            | 403                                               | IV         | 14782                 | 16204               |
| iYDL210W              | 405                                               | IV         | 85986                 | 86208               |
| iYDL189W              | 406                                               | IV         | 123590                | 123866              |
| iYDL180W              | 407                                               | IV         | 137540                | 138292              |
| iYDL170W              | 408                                               | IV         | 157905                | 158065              |
| iYDL167C              | Late/Late                                         | IV         | 163155                | 163450              |
| YDL161W               | Late/Late                                         | IV         | 167715                | 169079              |
| YDL159W               | Late/Late                                         | IV         | 172482                | 174029              |
| iYDL155W <sup>b</sup> | Late/Late                                         | IV         | 178057                | 178335              |
| iYDL152W <sup>b</sup> | Late/Late                                         | IV         | 183188                | 183319              |
| iYDL149W              | Late/Late                                         | IV         | 187919                | 188155              |
| iYDL146W <sup>b</sup> | Late/Late                                         | IV         | 194226                | 194572              |
| iYDL145C              | Late/Late                                         | IV         | 198177                | 198663              |
| iYDL142C              | Late/Late                                         | IV         | 202571                | 203040              |
| YDL140C               | Late/Late                                         | IV         | 206307                | 207319              |
| iYDL139C              | 409                                               | IV         | 212119                | 213352              |
| iYDL116W              | 410                                               | IV         | 253745                | 253994              |
| iYDL114W              | 411                                               | IV         | 256529                | 256632              |
| iYDL078C              | 412                                               | IV         | 316387                | 316970              |
| YDL072C               | 413                                               | IV         | 330446                | 329835              |
| iYDL025C              | 414                                               | IV         | 407247                | 408492              |
| iYDLCdelta1-0         | 415                                               | IV         | 434780                | 435985              |

**Supplementary Table I.** Continued from previous page.

| <b>Gene ID</b>           | <b>proARS/<br/>Inter-origin locus<sup>a</sup></b> | <b>Chr</b> | <b>Start<br/>(bp)</b> | <b>End<br/>(bp)</b> |
|--------------------------|---------------------------------------------------|------------|-----------------------|---------------------|
| iYDR008C                 | 416(ARS1)                                         | IV         | 462643                | 463475              |
| iYDR018C                 | 417                                               | IV         | 483900                | 484203              |
| itV(UAC)D                | Early/Early                                       | IV         | 488910                | 489548              |
| iYDR026C                 | Early/Early                                       | IV         | 494308                | 494689              |
| YDR028C                  | Early/Early                                       | IV         | 500874                | 497830              |
| iYDR031W                 | Early/Early                                       | IV         | 503891                | 504138              |
| iYDR033W <sup>b</sup>    | Early/Early                                       | IV         | 509148                | 509776              |
| iYDRCdelta3 <sup>b</sup> | Early/Early                                       | IV         | 513629                | 513731              |
| itL(UAA)D <sup>b</sup>   | Early/Early                                       | IV         | 519865                | 520212              |
| iYDR036C <sup>b</sup>    | Early/Early                                       | IV         | 524752                | 525479              |
| YDR038C                  | Early/Early                                       | IV         | 527801                | 528809              |
| iYDR039C                 | Early/Early                                       | IV         | 534621                | 535231              |
| iYDR040C                 | Early/Early                                       | IV         | 538506                | 539842              |
| iYDR043C-1               | Early/Early                                       | IV         | 544500                | 545591              |
| YDR046C                  | Early/Early                                       | IV         | 550571                | 548757              |
| iYDR049W                 | 418                                               | IV         | 555192                | 555766              |
| YDR058C                  | 419                                               | IV         | 568698                | 567718              |
| iYDR091C                 | 420                                               | IV         | 628572                | 629914              |
| iYDR096W                 | 421                                               | IV         | 639861                | 640147              |
| iYDR125C                 | 422                                               | IV         | 702796                | 703272              |
| iYDR147W                 | 423                                               | IV         | 753273                | 753713              |
| iYDR150W                 | 424                                               | IV         | 763912                | 764216              |
| iYDR170W-A-1             | 425                                               | IV         | 805607                | 806659              |
| YDR186C                  | 426                                               | IV         | 835484                | 832851              |
| iYDR216W                 | 427                                               | IV         | 899042                | 899587              |
| iYDR223W                 | 428                                               | IV         | 913538                | 914353              |
| iYDR227W                 | 429                                               | IV         | 921683                | 921962              |
| iYDR277C                 | 430                                               | IV         | 1015738               | 1017037             |
| iYDR297W                 | 431                                               | IV         | 1057636               | 1058212             |
| iYDR342C-2               | 432                                               | IV         | 1158415               | 1159643             |
| YDR344C                  | Chr4E/LExtra                                      | IV         | 1162439               | 1161996             |
| YDR346C                  | Chr4E/LExtra                                      | IV         | 1168649               | 1167204             |
| iYDR347W                 | Early/Late                                        | IV         | 1170178               | 1170361             |
| YDR349C                  | Chr4E/LExtra                                      | IV         | 1174166               | 1172376             |

**Supplementary Table I.** Continued from previous page.

| <b>Gene ID</b>        | <b>proARS/<br/>Inter-origin locus<sup>a</sup></b> | <b>Chr</b> | <b>Start<br/>(bp)</b> | <b>End<br/>(bp)</b> |
|-----------------------|---------------------------------------------------|------------|-----------------------|---------------------|
| iYDRWdelta26          | Early/Late                                        | IV         | 1175682               | 1175864             |
| iYDR350C              | Chr4E/LExtra                                      | IV         | 1178208               | 1178700             |
| iYDR351W              | Early/Late                                        | IV         | 1181294               | 1181835             |
| YDR353W               | Chr4E/LExtra                                      | IV         | 1183288               | 1184247             |
| iYDR354W              | Early/Late                                        | IV         | 1185923               | 1186101             |
| YDR356W               | Chr4E/LExtra                                      | IV         | 1186596               | 1188430             |
| YDR358W <sup>b</sup>  | Early/Late                                        | IV         | 1190048               | 1191721             |
| YDR359C               | Chr4E/LExtra                                      | IV         | 1194374               | 1192495             |
| YDR361C               | Early/Late                                        | IV         | 1195502               | 1196201             |
| iYDR362C              | Chr4E/LExtra                                      | IV         | 1198731               | 1199217             |
| iYDR363W              | Early/Late                                        | IV         | 1200587               | 1201784             |
| YDR364C               | Chr4E/LExtra                                      | IV         | 1204199               | 1202832             |
| iYDR365C              | Early/Late                                        | IV         | 1206417               | 1206738             |
| YDR367W               | Chr4E/LExtra                                      | IV         | 1212837               | 1213603             |
| iYDR383C              | 433                                               | IV         | 1240752               | 1241238             |
| iYDR388W              | Late/Late                                         | IV         | 1251668               | 1252571             |
| iYDR390C              | Late/Late                                         | IV         | 1256881               | 1257042             |
| iYDR393W <sup>b</sup> | Late/Late                                         | IV         | 1261305               | 1261715             |
| iYDR395W              | Late/Late                                         | IV         | 1266192               | 1266329             |
| iYDR399W              | Late/Late                                         | IV         | 1270767               | 1270983             |
| iYDR403W              | 434                                               | IV         | 1276246               | 1276688             |
| iYDR418W              | 435                                               | IV         | 1302147               | 1303208             |
| itS(AGA)D3            | 436                                               | IV         | 1305746               | 1306301             |
| iYDRWdelta30          | 437                                               | IV         | 1353260               | 1353759             |
| iYDR447C              | 438                                               | IV         | 1355587               | 1356099             |
| iYDR457W              | 439                                               | IV         | 1379630               | 1380089             |
| iYDR472W              | 440                                               | IV         | 1404207               | 1404479             |
| iYDR498C              | 441                                               | IV         | 1447042               | 1447878             |
| iYDR502C              | 442                                               | IV         | 1454512               | 1455090             |
| itL(CAA)D             | 443                                               | IV         | 1461877               | 1462406             |
| iYDR509W              | 444                                               | IV         | 1468621               | 1469448             |
| iYDR511W              | 445                                               | IV         | 1470466               | 1470548             |
| iYDR523C              | 446                                               | IV         | 1487086               | 1487590             |
| iYDR533C              | 447                                               | IV         | 1502208               | 1503361             |

**Supplementary Table I.** Continued from previous page.

| <b>Gene ID</b> | <b>proARS/<br/>Inter-origin locus<sup>a</sup></b> | <b>Chr</b> | <b>Start<br/>(bp)</b> | <b>End<br/>(bp)</b> |
|----------------|---------------------------------------------------|------------|-----------------------|---------------------|
| iYDR534C-1     | 448                                               | IV         | 1505800               | 1506653             |
| iYDR542W       | 449                                               | IV         | 1523652               | 1524675             |
| YDR545W        | 450                                               | IV         | 1526317               | 1531707             |
| iYEL077C       | 502(TelV-L)                                       | V          | 4097                  | 4185                |
| iYEL074W       | 503(R1)                                           | V          | 6464                  | 7230                |
| iYEL073C-1     | 504(R1)                                           | V          | 8786                  | 10019               |
| iYEL073C-3     | 505(R1)                                           | V          | 11252                 | 12485               |
| iYEL071W-0     | 506                                               | V          | 17845                 | 18717               |
| iYEL051W       | 507(R2)                                           | V          | 59148                 | 59670               |
| iYEL031W       | 508(R3)                                           | V          | 93905                 | 94644               |
| YEL023C        | 509(wk)                                           | V          | 108977                | 109894              |
| iYEL006W       | 510(R4)                                           | V          | 145333                | 145906              |
| iYER010C-0     | 511(R5)                                           | V          | 173337                | 174292              |
| iYER028C       | 512(R6)                                           | V          | 211875                | 212586              |
| iYER052C       | 513(R7)                                           | V          | 257957                | 258736              |
| iYER065C       | 514(R8)                                           | V          | 286912                | 287743              |
| iYER077C       | 515(R9)                                           | V          | 316596                | 316803              |
| iYERWdelta12   | 516(R10)                                          | V          | 353731                | 354132              |
| iYER123W       | 517(R11)                                          | V          | 406428                | 407339              |
| itV(AAC)E1     | 518                                               | V          | 438770                | 439613              |
| iSCR1          | 519                                               | V          | 442412                | 442731              |
| iYERCdelta24   | 520(R12)                                          | V          | 498417                | 499343              |
| iYER167W       | 521(R13)                                          | V          | 520767                | 521025              |
| iYER179W       | 522(501)                                          | V          | 549513                | 549720              |
| iYERWomega2-0  | 523(TelV-R)                                       | V          | 569020                | 570085              |
| YFL063W        | 600.1/120                                         | VI         | 5113                  | 5312                |
| YFL062W        | Chr6Extra                                         | VI         | 6426                  | 7565                |
| iYFL059W       | 600.2(w)                                          | VI         | 12259                 | 12929               |
| iYFL058W       | Chr6Extra                                         | VI         | 13989                 | 14220               |
| iYFL056C-1     | Chr6Extra                                         | VI         | 16217                 | 17004               |
| iYFL055W-0     | 600.3(w)                                          | VI         | 18680                 | 19763               |
| iYFL055W-1     | 600.4(w)                                          | VI         | 19763                 | 20847               |
| YFL054C        | Chr6Extra                                         | VI         | 22787                 | 20847               |
| YFL051C        | Chr6Extra                                         | VI         | 30489                 | 30058               |

**Supplementary Table I.** Continued from previous page.

| <b>Gene ID</b>       | <b>proARS/<br/>Inter-origin locus<sup>a</sup></b> | <b>Chr</b> | <b>Start<br/>(bp)</b> | <b>End<br/>(bp)</b> |
|----------------------|---------------------------------------------------|------------|-----------------------|---------------------|
| iYFL051C-1           | 601/602                                           | VI         | 31906                 | 33272               |
| YFL050C              | Chr6Extra                                         | VI         | 36348                 | 32772               |
| iYFL049W             | FALSE                                             | VI         | 38674                 | 38843               |
| iYFL048C             | Chr6Extra                                         | VI         | 40180                 | 40421               |
| YFL034W              | Chr6Extra                                         | VI         | 66226                 | 67947               |
| iYFL034W             | 603                                               | VI         | 68697                 | 69114               |
| iYFL033C             | Early/Late                                        | VI         | 74426                 | 74871               |
| iYFL031W             | Chr6Extra                                         | VI         | 75780                 | 76829               |
| YFL029C              | Chr6Extra                                         | VI         | 79159                 | 78053               |
| YFL028C              | Early/Late                                        | VI         | 80211                 | 79342               |
| YFL027C              | Chr6Extra                                         | VI         | 81910                 | 80417               |
| YFL026W              | Chr6Extra                                         | VI         | 82578                 | 83873               |
| YFL025C <sup>b</sup> | Early/Late                                        | VI         | 87232                 | 84143               |
| YFL023W              | Chr6Extra                                         | VI         | 91384                 | 92974               |
| iYFL022C             | Early/Late                                        | VI         | 95008                 | 95964               |
| iYFL021W-0           | Chr6Extra                                         | VI         | 97496                 | 98360               |
| iYFLWdelta1          | Early/Late                                        | VI         | 100895                | 101370              |
| YFL018C              | Chr6Extra                                         | VI         | 103121                | 101622              |
| iYFL016C             | Early/Late                                        | VI         | 106230                | 106463              |
| YFL014W              | Chr6Extra                                         | VI         | 107250                | 107579              |
| iYFL010C             | Chr6Extra                                         | VI         | 115764                | 116149              |
| iYFL009W             | 603.5                                             | VI         | 118478                | 119424              |
| YFL003C              | 605                                               | VI         | 135639                | 136459              |
| itN(GUU)F            | Chr6Extra                                         | VI         | 137553                | 137657              |
| itY(GUA)F1           | 606                                               | VI         | 167517                | 167880              |
| iYFR012W             | Chr6Extra                                         | VI         | 168488                | 169913              |
| YFR022W              | Chr6Extra                                         | VI         | 197070                | 198771              |
| iYFR022W             | 607                                               | VI         | 199021                | 199861              |
| iYFR024C-A           | FALSE                                             | VI         | 203420                | 203730              |
| itA(AGC)F            | Chr6Extra                                         | VI         | 204983                | 205735              |
| YFR030W              | Chr6Extra                                         | VI         | 214049                | 215656              |
| iYFR030W             | 608                                               | VI         | 216406                | 216581              |
| YFR053C              | Chr6Extra                                         | VI         | 255037                | 253580              |
| iYFR053C-1           | 609                                               | VI         | 256305                | 257573              |



**Supplementary Table I.** Continued from previous page.

| <b>Gene ID</b> | <b>proARS/<br/>Inter-origin locus<sup>a</sup></b> | <b>Chr</b> | <b>Start<br/>(bp)</b> | <b>End<br/>(bp)</b> |
|----------------|---------------------------------------------------|------------|-----------------------|---------------------|
| iYFR055W-1     | Chr6Extra                                         | VI         | 266492                | 267770              |
| YFR057W        | 610                                               | VI         | 269049                | 269504              |
| iYGL230C       | 702                                               | VII        | 64214                 | 64502               |
| iYGL228W       | 703                                               | VII        | 69330                 | 69670               |
| iYGLWdelta3    | 705                                               | VII        | 115271                | 115490              |
| iYGL202W       | 706(ARO8)                                         | VII        | 117563                | 117856              |
| iYGL180W       | 707                                               | VII        | 162762                | 163413              |
| iYGL179C-1     | 708                                               | VII        | 166225                | 167356              |
| YGL168W        | 709                                               | VII        | 187468                | 187800              |
| iYGL159W       | 710                                               | VII        | 203837                | 204986              |
| YGL145W        | 711(ARS701)                                       | VII        | 230246                | 232351              |
| iYGL141W       | 712                                               | VII        | 241088                | 241356              |
| YGL128C        | 713                                               | VII        | 269379                | 270180              |
| iYGL119W       | 714                                               | VII        | 285948                | 287351              |
| iYGL118C       | 715                                               | VII        | 288452                | 288513              |
| iYGL084C       | 716                                               | VII        | 352296                | 353056              |
| iYGL062W       | 717                                               | VII        | 388730                | 388966              |
| iYGL040C-0     | 718                                               | VII        | 420552                | 421820              |
| iYGL007W-1     | 719                                               | VII        | 484774                | 485916              |
| iYGR008C       | 720                                               | VII        | 508358                | 509041              |
| iYGRCdelta16   | 721                                               | VII        | 567754                | 568734              |
| iYGR039W       | 722                                               | VII        | 575193                | 575392              |
| YGR040W        | 723                                               | VII        | 575478                | 576340              |
| iYGR043C-0     | 724                                               | VII        | 581430                | 582207              |
| YGR069W        | 725                                               | VII        | 627077                | 627412              |
| iYGR087C-0     | 726                                               | VII        | 652975                | 653785              |
| YGR110W        | 728                                               | VII        | 713976                | 714879              |
| iYGR143W       | 729                                               | VII        | 777502                | 778778              |
| YGR152C        | 730                                               | VII        | 794678                | 795456              |
| iYGR168C       | 731                                               | VII        | 834476                | 834683              |
| iYGR211W       | 732                                               | VII        | 916695                | 917034              |
| iYGR243W       | 733                                               | VII        | 977771                | 978031              |
| iYGR253C-0     | 734                                               | VII        | 999135                | 1000028             |
| iYGR254W       | 735                                               | VII        | 1002235               | 1002518             |

**Supplementary Table I.** Continued from previous page.

| <b>Gene ID</b>        | <b>proARS/<br/>Inter-origin locus<sup>a</sup></b> | <b>Chr</b> | <b>Start<br/>(bp)</b> | <b>End<br/>(bp)</b> |
|-----------------------|---------------------------------------------------|------------|-----------------------|---------------------|
| iYGR257C              | Late/Late                                         | VII        | 1007301               | 1007667             |
| iYGR258C-1            | Late/Late                                         | VII        | 1011619               | 1012477             |
| iYGR262C              | Late/Late                                         | VII        | 1017755               | 1017963             |
| iYGR269W <sup>b</sup> | Late/Late                                         | VII        | 1026958               | 1027366             |
| iYGR270W <sup>b</sup> | Late/Late                                         | VII        | 1031505               | 1031787             |
| iYGR271W <sup>b</sup> | Late/Late                                         | VII        | 1037690               | 1038038             |
| iYGR274C              | Late/Late                                         | VII        | 1043091               | 1043185             |
| iYGR278W <sup>b</sup> | Late/Late                                         | VII        | 1048460               | 1048794             |
| iYGR280C <sup>b</sup> | Late/Late                                         | VII        | 1051721               | 1052820             |
| iYGR282C              | Late/Late                                         | VII        | 1058720               | 1059011             |
| iYGR285C <sup>b</sup> | Late/Late                                         | VII        | 1063149               | 1063809             |
| iYGR287C              | Late/Late                                         | VII        | 1068987               | 1070289             |
| iYGR288W-1            | Late/Late                                         | VII        | 1072834               | 1073959             |
| iYGR292W-0            | Late/Late                                         | VII        | 1078349               | 1079115             |
| iYGR295C-1            | 736                                               | VII        | 1083792               | 1084860             |
| iYHL049C-1            | 801                                               | VIII       | 5470                  | 6400                |
| iYHLComegal           | 802                                               | VIII       | 8224                  | 8298                |
| iYHL043W              | Late/Late                                         | VIII       | 15411                 | 15665               |
| iYHL038C              | Late/Late                                         | VIII       | 25506                 | 25698               |
| YHL033C               | Late/Late                                         | VIII       | 36023                 | 35253               |
| iYHL031C              | Late/Late                                         | VIII       | 39484                 | 40082               |
| iYHL030W              | 804                                               | VIII       | 45688                 | 45927               |
| iYHL022C              | 805(SPO11)                                        | VIII       | 64154                 | 64458               |
| itT(AGU)H             | 806                                               | VIII       | 116172                | 116414              |
| itQ(UUG)H             | 807                                               | VIII       | 134383                | 134545              |
| YHR018C               | 808                                               | VIII       | 141393                | 140002              |
| iYHR029C              | 809                                               | VIII       | 168552                | 168881              |
| iYHR053C              | 810                                               | VIII       | 212720                | 213185              |
| iYHR055C              | 811                                               | VIII       | 214718                | 215183              |
| iYHR057C              | 812                                               | VIII       | 218844                | 218998              |
| iYHR073W              | 813                                               | VIII       | 245573                | 246194              |
| iYHR091C              | 814                                               | VIII       | 286771                | 287131              |
| iYHR096C              | 815                                               | VIII       | 296449                | 297387              |
| YIL030C               | Late/Late                                         | VIII       | 300008                | 296049              |

**Supplementary Table I.** Continued from previous page.

| <b>Gene ID</b> | <b>proARS/<br/>Inter-origin locus<sup>a</sup></b> | <b>Chr</b> | <b>Start<br/>(bp)</b> | <b>End<br/>(bp)</b> |
|----------------|---------------------------------------------------|------------|-----------------------|---------------------|
| iYHRWdelta9    | 816                                               | VIII       | 359374                | 359704              |
| YHR140W        | 817                                               | VIII       | 380625                | 381171              |
| iYHR146W       | 818                                               | VIII       | 391697                | 392639              |
| YHR147C        | 819                                               | VIII       | 392741                | 393246              |
| iYHR184W       | 821                                               | VIII       | 474454                | 474622              |
| iYHR201C       | 822                                               | VIII       | 501138                | 502383              |
| YHR209W        | 823                                               | VIII       | 519557                | 520082              |
| YHR212C        | Late/Late                                         | VIII       | 538090                | 537755              |
| iYHR213W-0     | Late/Late                                         | VIII       | 539742                | 540694              |
| iYHRCdelta16-0 | Late/Late                                         | VIII       | 549632                | 550863              |
| YHR217C        | 824                                               | VIII       | 556619                | 557030              |
| iYIL177C-1     | 902                                               | IX         | 7470                  | 8793                |
| iYIL174W-1     | 903                                               | IX         | 10594                 | 11492               |
| iYIL173W       | 904                                               | IX         | 16141                 | 16784               |
| iYIL166C       | 905                                               | IX         | 32566                 | 33718               |
| iYIL156W       | 906                                               | IX         | 51306                 | 51759               |
| iYIL147C       | 907                                               | IX         | 73453                 | 74184               |
| iYIL130W       | 909                                               | IX         | 105676                | 106107              |
| iYIL129C       | 910                                               | IX         | 113237                | 113806              |
| iYIL120W       | 911                                               | IX         | 136105                | 136651              |
| YIL101C        | 912                                               | IX         | 175673                | 176612              |
| iYIL078W       | 913(901)                                          | IX         | 214700                | 214988              |
| iYIL058W       | 914                                               | IX         | 247195                | 247899              |
| iYIL057C       | 915                                               | IX         | 248393                | 248847              |
| iYIL035C       | Late/Late                                         | IX         | 288907                | 289225              |
| iYIL032C       | Late/Late                                         | IX         | 292316                | 292632              |
| iYIL028W       | Late/Late                                         | IX         | 302496                | 303677              |
| YIL025C        | 916                                               | IX         | 308199                | 308573              |
| iYIL023C       | 917                                               | IX         | 310424                | 311163              |
| iYIL021W       | 918                                               | IX         | 313859                | 314033              |
| iYIL009W       | 919                                               | IX         | 341425                | 342533              |
| iYIR001C       | 920                                               | IX         | 356892                | 357412              |
| iYIR003W       | 921                                               | IX         | 362921                | 363218              |
| iYIR029W       | 922                                               | IX         | 411835                | 412033              |

**Supplementary Table I.** Continued from previous page.

| <b>Gene ID</b> | <b>proARS/<br/>Inter-origin locus<sup>a</sup></b> | <b>Chr</b> | <b>Start<br/>(bp)</b> | <b>End<br/>(bp)</b> |
|----------------|---------------------------------------------------|------------|-----------------------|---------------------|
| YJL225C        | 1001(+)                                           | X          | 543                   | 1373                |
| iYJL225C-1     | 1002(+)                                           | X          | 7453                  | 8776                |
| iYJL222W       | 1003(+)                                           | X          | 16124                 | 16767               |
| iYJL217W       | 1004(+)                                           | X          | 23729                 | 24341               |
| iYJL215C       | Questionable                                      | X          | 26771                 | 26887               |
| iYJL201W       | Non-origin                                        | X          | 56178                 | 56444               |
| iYJL197W       | 1005(+)                                           | X          | 67568                 | 67849               |
| iYJL172W       | 1006(+)                                           | X          | 99460                 | 99697               |
| iYJL163C       | 1007(+)                                           | X          | 113327                | 114175              |
| iYJL157C       | Non-origin                                        | X          | 126025                | 126587              |
| iYJL146W       | Non-origin                                        | X          | 144399                | 144858              |
| YJL119C        | Non-origin                                        | X          | 191272                | 191595              |
| itD(GUC)J1     | 1008(+)                                           | X          | 204503                | 205002              |
| isnR37         | 1009(+)                                           | X          | 228297                | 228722              |
| YJL092W        | Non-origin                                        | X          | 258972                | 260027              |
| iYJL075C       | 1010(+)                                           | X          | 298572                | 298853              |
| YJL068C        | Non-origin                                        | X          | 312908                | 313407              |
| iYJL053W       | 1011(+)                                           | X          | 336733                | 337967              |
| itR(ucu)J2     | 1012(+)                                           | X          | 374273                | 374540              |
| iYJL038C       | 1013(wk)                                          | X          | 375470                | 376358              |
| iYJL037W       | Non-origin                                        | X          | 377032                | 377294              |
| YJL034W        | Early/Early                                       | X          | 381023                | 383071              |
| iYJL031C       | Early/Early                                       | X          | 386936                | 387353              |
| iYJL017W       | Early/Early                                       | X          | 406256                | 406448              |
| iYJL013C       | Early/Early                                       | X          | 410729                | 411141              |
| iYJLWdelta9    | 1014(+)                                           | X          | 416714                | 417250              |
| iYJR003C       | 1015(+)                                           | X          | 442300                | 442596              |
| iYJR009C-0     | 1016(false)                                       | X          | 454368                | 455147              |
| iYJR011C       | 1017(false)                                       | X          | 459113                | 459482              |
| iYJR044C       | Questionable                                      | X          | 518873                | 519326              |
| iYJR055W       | 1018(+)                                           | X          | 538954                | 540454              |
| iYJR058C       | Early/Early                                       | X          | 544863                | 545475              |
| iYJR062C       | Early/Early                                       | X          | 554537                | 554883              |
| iYJR065C       | Early/Early                                       | X          | 558846                | 559104              |

**Supplementary Table I.** Continued from previous page.

| <b>Gene ID</b>        | <b>proARS/<br/>Inter-origin locus<sup>a</sup></b> | <b>Chr</b> | <b>Start<br/>(bp)</b> | <b>End<br/>(bp)</b> |
|-----------------------|---------------------------------------------------|------------|-----------------------|---------------------|
| YJR069C <sup>b</sup>  | Early/Early                                       | X          | 569087                | 568494              |
| YJR075W <sup>b</sup>  | Early/Early                                       | X          | 573669                | 574859              |
| YJR078W <sup>b</sup>  | Early/Early                                       | X          | 578548                | 579909              |
| iYJR084W <sup>b</sup> | Early/Early                                       | X          | 584692                | 584808              |
| YJR089W <sup>b</sup>  | Early/Early                                       | X          | 587406                | 590270              |
| iYJR090C              | Early/Early                                       | X          | 594015                | 594749              |
| YJR092W               | Early/Early                                       | X          | 598807                | 602769              |
| YJR094C               | Early/Early                                       | X          | 605342                | 604260              |
| YJR095W               | Early/Early                                       | X          | 609464                | 610432              |
| iYJR097W              | 1019(+)                                           | X          | 612622                | 612877              |
| YJR115W               | Questionable                                      | X          | 639743                | 640143              |
| YJR118C               | Questionable                                      | X          | 643183                | 643794              |
| iYJR124C              | 1020(+)                                           | X          | 653927                | 654426              |
| iYJR137C              | 1021(121)                                         | X          | 682974                | 684256              |
| iYJR139C              | Questionable                                      | X          | 690213                | 690439              |
| iYJR144W              | Questionable                                      | X          | 701380                | 701716              |
| iYJR150C-1            | 1022(+)                                           | X          | 710670                | 711944              |
| iYJR156C              | 1023(+)                                           | X          | 729285                | 730204              |
| iYJR159W              | 1024(wk)                                          | X          | 736806                | 737697              |
| iYJR161C              | 1025(+)                                           | X          | 743688                | 744600              |
| iYKL225W              | 1101                                              | XI         | 799                   | 1811                |
| iYKL221W-0            | 1102                                              | XI         | 7529                  | 8310                |
| iYKL204W              | 1103                                              | XI         | 55602                 | 55935               |
| iYKL188C              | 1104                                              | XI         | 88791                 | 89289               |
| YKL178C               | 1105                                              | XI         | 114629                | 113217              |
| YKL160W               | 1106                                              | XI         | 153271                | 153708              |
| iYKL098W              | 1107                                              | XI         | 257488                | 258148              |
| iYKLWdelta7           | 1108                                              | XI         | 314169                | 314457              |
| iYKL059C              | 1109                                              | XI         | 329088                | 329811              |
| iYKL057C              | 1110                                              | XI         | 333614                | 334057              |
| YKL031W               | 1111                                              | XI         | 381710                | 382123              |
| iYKL027W              | 1112                                              | XI         | 388546                | 389021              |
| iYKL014C              | 1113                                              | XI         | 416554                | 417149              |
| iYKR004C              | 1114                                              | XI         | 447318                | 448162              |

**Supplementary Table I.** Continued from previous page.

| <b>Gene ID</b>        | <b>proARS/<br/>Inter-origin locus<sup>a</sup></b> | <b>Chr</b> | <b>Start<br/>(bp)</b> | <b>End<br/>(bp)</b> |
|-----------------------|---------------------------------------------------|------------|-----------------------|---------------------|
| iYKR011C              | 1115                                              | XI         | 462337                | 463380              |
| iYKR039W              | 1116                                              | XI         | 516511                | 517093              |
| iYKR050W              | 1117                                              | XI         | 530124                | 530586              |
| iYKR075C-1            | 1118                                              | XI         | 581155                | 581922              |
| iYKR077W              | 1119                                              | XI         | 584383                | 584591              |
| iYKR091W              | 1120                                              | XI         | 611902                | 612302              |
| iYKR093W              | 1121                                              | XI         | 617172                | 617633              |
| YKR098C               | 1122                                              | XI         | 634809                | 632656              |
| iYKR101W-0            | 1123                                              | XI         | 642136                | 643420              |
| YKR105C               | 1124                                              | XI         | 660093                | 658345              |
| YLL065W               | 1201                                              | XII        | 11771                 | 12028               |
| YLL055W               | 1202                                              | XII        | 30209                 | 31384               |
| YLL042C               | 1203                                              | XII        | 52086                 | 52589               |
| YLL034C               | 1204                                              | XII        | 71074                 | 71892               |
| iYLL032C              | 1205                                              | XII        | 76746                 | 77151               |
| iYLL026W              | 1206                                              | XII        | 91348                 | 92049               |
| YLL005C               | 1207                                              | XII        | 138184                | 139163              |
| iCEN12                | 1208                                              | XII        | 150946                | 151388              |
| iYLR002C              | 1209                                              | XII        | 156333                | 156854              |
| iYLR036C              | 1210                                              | XII        | 222133                | 222686              |
| iYLR042C              | 1211                                              | XII        | 230452                | 231703              |
| iYLR080W              | 1212                                              | XII        | 289251                | 290213              |
| YLR084C               | Early/Late                                        | XII        | 297483                | 298293              |
| YLR086W               | Early/Late                                        | XII        | 302244                | 306500              |
| iYLR087C <sup>b</sup> | Early/Late                                        | XII        | 315732                | 316108              |
| YLR090W <sup>b</sup>  | Early/Late                                        | XII        | 320702                | 322081              |
| YLR093C <sup>b</sup>  | Early/Late                                        | XII        | 327269                | 326514              |
| iYLR095C <sup>b</sup> | Early/Late                                        | XII        | 332116                | 332591              |
| iYLR097C <sup>b</sup> | Early/Late                                        | XII        | 337266                | 337528              |
| YLR100W <sup>b</sup>  | Early/Late                                        | XII        | 341811                | 342854              |
| YLR105C               | Early/Late                                        | XII        | 347063                | 348173              |
| YLR106C               | Early/Late                                        | XII        | 351146                | 352335              |
| iYLR106C              | Early/Late                                        | XII        | 363739                | 364117              |
| YLR109W               | Early/Late                                        | XII        | 368782                | 369312              |

**Supplementary Table I.** Continued from previous page.

| <b>Gene ID</b> | <b>proARS/<br/>Inter-origin locus<sup>a</sup></b> | <b>Chr</b> | <b>Start<br/>(bp)</b> | <b>End<br/>(bp)</b> |
|----------------|---------------------------------------------------|------------|-----------------------|---------------------|
| iYLR113W       | 1213                                              | XII        | 372928                | 374000              |
| iYLR117C       | 1214                                              | XII        | 384535                | 384726              |
| iYLR134W       | 1215                                              | XII        | 412415                | 413282              |
| iYLRWdelta6-0  | 1216                                              | XII        | 449029                | 450404              |
| YLR178C        | 1217                                              | XII        | 513256                | 513786              |
| iYLR228C-0     | 1218                                              | XII        | 602463                | 603337              |
| YLR242C        | 1219                                              | XII        | 623198                | 623861              |
| iYLR257W       | 1220                                              | XII        | 659791                | 660716              |
| YLR293C        | 1221                                              | XII        | 720784                | 721418              |
| iYLR300W       | 1222                                              | XII        | 730301                | 730825              |
| iYLR306W       | 1223                                              | XII        | 744851                | 745620              |
| iYLR308W       | 1224                                              | XII        | 748875                | 749034              |
| YLR319C        | 1225                                              | XII        | 769482                | 770633              |
| itD(GUC)L2     | 1226                                              | XII        | 793988                | 794485              |
| iYLR345W       | 1227                                              | XII        | 822039                | 822286              |
| YLR399C        | 1228                                              | XII        | 919799                | 920993              |
| iYLR403W       | 1229                                              | XII        | 927615                | 928739              |
| iYLR405W       | 1230                                              | XII        | 930888                | 931061              |
| iYLR411W       | 1231                                              | XII        | 947973                | 948363              |
| iYLR435W       | 1232                                              | XII        | 1006989               | 1007415             |
| YLR438W        | 1233                                              | XII        | 1012504               | 1013399             |
| iYLR444C       | 1234                                              | XII        | 1023982               | 1024183             |
| iYLR459W       | 1235                                              | XII        | 1058513               | 1059752             |
| iYLR461W-0     | 1236                                              | XII        | 1063276               | 1064613             |
| iYLR466W       | 1237                                              | XII        | 1071230               | 1072503             |
| iYML133C-1     | 1301                                              | XIII       | 5964                  | 7244                |
| iYML132W-1     | 1302                                              | XIII       | 9291                  | 10199               |
| iYML119W       | 1303                                              | XIII       | 31684                 | 32334               |
| iYML116W       | 1304                                              | XIII       | 39824                 | 40187               |
| YML087C        | 1305                                              | XIII       | 94602                 | 95145               |
| iYML077W       | 1306                                              | XIII       | 112344                | 112513              |
| iYML069W       | 1307                                              | XIII       | 137158                | 137550              |
| itG(GCC)M      | 1308                                              | XIII       | 183968                | 184170              |
| iYMLWdelta4    | Early/Late                                        | XIII       | 190083                | 190244              |

**Supplementary Table I.** Continued from previous page.

| <b>Gene ID</b>        | <b>proARS/<br/>Inter-origin locus<sup>a</sup></b> | <b>Chr</b> | <b>Start<br/>(bp)</b> | <b>End<br/>(bp)</b> |
|-----------------------|---------------------------------------------------|------------|-----------------------|---------------------|
| YMR045C               | Early/Late                                        | XIII       | 195006                | 195649              |
| YML041C               | Early/Late                                        | XIII       | 195006                | 195649              |
| YML039W               | Early/Late                                        | XIII       | 196628                | 201896              |
| YML036W <sup>b</sup>  | Early/Late                                        | XIII       | 205642                | 206211              |
| YML034W <sup>b</sup>  | Early/Late                                        | XIII       | 209525                | 212155              |
| iYML031W              | Early/Late                                        | XIII       | 216156                | 216435              |
| YML027W               | Early/Late                                        | XIII       | 221406                | 222563              |
| YML023C               | Early/Late                                        | XIII       | 228664                | 226994              |
| iYML004C              | 1309                                              | XIII       | 262685                | 263483              |
| iYMR010W-0            | 1310                                              | XIII       | 286316                | 287197              |
| iYMR011W              | 1311                                              | XIII       | 289703                | 290048              |
| YMR021C               | Early/Late                                        | XIII       | 318417                | 317164              |
| iYMR024W              | Early/Late                                        | XIII       | 323046                | 323299              |
| YMR028W               | Early/Late                                        | XIII       | 327481                | 328581              |
| YMR031C               | Early/Late                                        | XIII       | 334742                | 332211              |
| YMR033W <sup>b</sup>  | Early/Late                                        | XIII       | 337787                | 339276              |
| iYMR036C <sup>b</sup> | Early/Late                                        | XIII       | 343519                | 344402              |
| YMR039C               | Early/Late                                        | XIII       | 349521                | 348643              |
| YMR043W               | Early/Late                                        | XIII       | 353870                | 354730              |
| itH(GUG)M             | Early/Late                                        | XIII       | 363134                | 363363              |
| iYMR049C-0            | 1312                                              | XIII       | 370516                | 371480              |
| itV(AAC)M1            | 1313                                              | XIII       | 372517                | 372696              |
| itV(AAC)M2            | 1314                                              | XIII       | 420660                | 421483              |
| iYMR082C-0            | 1315                                              | XIII       | 432124                | 433455              |
| iYMR100W              | 1316                                              | XIII       | 468161                | 468444              |
| iYMR105C              | 1317                                              | XIII       | 477605                | 478300              |
| YMR110C               | 1318                                              | XIII       | 490450                | 491460              |
| iYMRWdelta16          | 1319                                              | XIII       | 503388                | 503770              |
| iYMR132C              | 1320                                              | XIII       | 535569                | 536206              |
| iYMR136W              | 1321                                              | XIII       | 542880                | 542977              |
| YMR144W               | 1322                                              | XIII       | 553421                | 554330              |
| iYMR175W              | 1323                                              | XIII       | 611254                | 611739              |
| iYMR186W              | 1324                                              | XIII       | 634471                | 634688              |
| iYMR192W              | 1325                                              | XIII       | 649279                | 650035              |



**Supplementary Table I.** Continued from previous page.

| <b>Gene ID</b> | <b>proARS/<br/>Inter-origin locus<sup>a</sup></b> | <b>Chr</b> | <b>Start<br/>(bp)</b> | <b>End<br/>(bp)</b> |
|----------------|---------------------------------------------------|------------|-----------------------|---------------------|
| iYMR210W       | 1326                                              | XIII       | 688864                | 689082              |
| YMR244W        | 1327                                              | XIII       | 757286                | 758314              |
| iYMR250W       | 1328                                              | XIII       | 772557                | 772914              |
| iYMR269W       | 1329                                              | XIII       | 805091                | 805326              |
| iYMR274C       | 1330                                              | XIII       | 815311                | 815651              |
| iYMRWdelta21   | 1331                                              | XIII       | 837764                | 837928              |
| iYMR311C       | 1332                                              | XIII       | 897603                | 898405              |
| iYMR321C       | 1333                                              | XIII       | 917895                | 918365              |
| YMR323W        | 1334                                              | XIII       | 920087                | 921400              |
| iYMR325W       | 1335                                              | XIII       | 923014                | 923493              |
| YNL339C        | 1401                                              | XIV        | 371                   | 6098                |
| iYNL337W       | 1402                                              | XIV        | 7419                  | 8330                |
| iYNL336W-1     | 1403                                              | XIV        | 10463                 | 11452               |
| iYNL333W       | 1404                                              | XIV        | 14163                 | 14832               |
| YNL326C        | 1405                                              | XIV        | 27353                 | 28318               |
| YNL303W        | 1406                                              | XIV        | 61509                 | 61856               |
| iYNL289W-1     | 1407                                              | XIV        | 89517                 | 90301               |
| iYNL287W       | 1408                                              | XIV        | 94799                 | 95221               |
| YNL285W        | 1409                                              | XIV        | 96245                 | 96461               |
| iYNL273W       | 1410                                              | XIV        | 126597                | 126803              |
| iYNL254C       | 1411                                              | XIV        | 169247                | 170017              |
| iYNL242W       | 1412                                              | XIV        | 196101                | 196425              |
| iYNL211C       | 1413                                              | XIV        | 250314                | 250930              |
| iYNL192W       | 1414                                              | XIV        | 279893                | 280428              |
| iYNL167C       | 1415                                              | XIV        | 321358                | 322218              |
| iYNL165W       | 1416                                              | XIV        | 325051                | 325264              |
| iYNL115C       | 1417                                              | XIV        | 412052                | 412683              |
| iYNL112W       | 1418                                              | XIV        | 416280                | 416939              |
| iYNL094W       | 1419                                              | XIV        | 449373                | 449867              |
| iYNL068C       | 1420                                              | XIV        | 498288                | 499680              |
| iYNL043C       | 1421                                              | XIV        | 545907                | 546421              |
| itT(AGU)N2     | 1422                                              | XIV        | 560763                | 561605              |
| itP(UGG)N2     | 1423                                              | XIV        | 568215                | 568520              |
| iYNL013C       | 1424                                              | XIV        | 609508                | 610053              |

**Supplementary Table I.** Continued from previous page.

| <b>Gene ID</b> | <b>proARS/<br/>Inter-origin locus<sup>a</sup></b> | <b>Chr</b> | <b>Start<br/>(bp)</b> | <b>End<br/>(bp)</b> |
|----------------|---------------------------------------------------|------------|-----------------------|---------------------|
| YNL008C        | 1425                                              | XIV        | 616307                | 617121              |
| iYNR003C       | 1426                                              | XIV        | 635296                | 635942              |
| iYNR034W-0     | 1427                                              | XIV        | 691285                | 692151              |
| YNR049C        | 1428                                              | XIV        | 713136                | 713640              |
| iYNR069C-1     | 1429                                              | XIV        | 763980                | 765372              |
| iYNR076W       | 1430                                              | XIV        | 782277                | 783284              |
| iYOL165C       | 1503                                              | XV         | 2078                  | 2894                |
| iYOL162W       | 1504                                              | XV         | 10765                 | 11548               |
| iYOL161C-1     | 1505                                              | XV         | 13111                 | 14312               |
| iYOLCdelta2    | 1506                                              | XV         | 18560                 | 19490               |
| iYOL132W       | 1507                                              | XV         | 72714                 | 73030               |
| iYOL125W       | 1508                                              | XV         | 85263                 | 85455               |
| itT(AGU)O1     | 1509                                              | XV         | 113873                | 114137              |
| iYOL104C       | Early/Early                                       | XV         | 117453                | 117702              |
| YOL103W        | Early/Early                                       | XV         | 123991                | 125829              |
| iYOL101C       | Early/Early                                       | XV         | 127919                | 129236              |
| iYOL098C       | Early/Early                                       | XV         | 135837                | 136087              |
| iYOL096C       | Early/Early                                       | XV         | 139056                | 139226              |
| iYOL093W       | Early/Early                                       | XV         | 143695                | 144203              |
| YOL090W        | Early/Early                                       | XV         | 148410                | 149596              |
| YOL088C        | Early/Early                                       | XV         | 154744                | 153911              |
| YOL086C        | Early/Early                                       | XV         | 159690                | 160563              |
| iYOL083W-0     | 1510                                              | XV         | 166951                | 167838              |
| iYOL024W       | 1511                                              | XV         | 277604                | 278056              |
| YOL009C        | 1512                                              | XV         | 309359                | 309925              |
| iYOR005C       | 1513                                              | XV         | 337343                | 337680              |
| iYOR058C-0     | 1514                                              | XV         | 436346                | 437261              |
| iYOR128C       | 1516(ADE2)                                        | XV         | 566189                | 566875              |
| iYORWdelta14   | 1517(1502)                                        | XV         | 600731                | 601381              |
| iYOR151C       | 1518                                              | XV         | 616669                | 617516              |
| iYOR172W       | 1519                                              | XV         | 656568                | 657130              |
| iYOR184W       | 1520                                              | XV         | 680542                | 681442              |
| iYOR206W       | 1521                                              | XV         | 729642                | 730006              |
| iYOR227W       | 1522                                              | XV         | 766563                | 766867              |

**Supplementary Table I.** Continued from previous page.

| <b>Gene ID</b> | <b>proARS/<br/>Inter-origin locus<sup>a</sup></b> | <b>Chr</b> | <b>Start<br/>(bp)</b> | <b>End<br/>(bp)</b> |
|----------------|---------------------------------------------------|------------|-----------------------|---------------------|
| YOR228C        | 1523                                              | XV         | 766904                | 767435              |
| iYOR237W       | 1524                                              | XV         | 783296                | 783666              |
| iYORWsigma3    | 1525                                              | XV         | 854609                | 855142              |
| iYOR296W       | 1526                                              | XV         | 874066                | 874738              |
| iYOR316C-0     | 1528                                              | XV         | 907546                | 908440              |
| YOR345C        | 1529                                              | XV         | 981804                | 982154              |
| iYOR390W       | 1530                                              | XV         | 1077903               | 1078537             |
| iYPL283C-1     | 1601                                              | XVI        | 6970                  | 7933                |
| iYPL280W       | 1602                                              | XVI        | 12600                 | 13228               |
| YPL275W        | 1603                                              | XVI        | 18369                 | 19079               |
| iYPL265W       | 1604                                              | XVI        | 42869                 | 43283               |
| iYPL253C       | 1605                                              | XVI        | 73006                 | 73363               |
| iYPL243W       | 1606                                              | XVI        | 90316                 | 90622               |
| iYPL230W       | 1607                                              | XVI        | 116487                | 117067              |
| iYPL207W       | 1608                                              | XVI        | 162340                | 162631              |
| iYPLWdelta7    | 1609                                              | XVI        | 210770                | 211576              |
| iYPL177C-1     | 1610                                              | XVI        | 214986                | 216011              |
| iYPL175W       | 1611                                              | XVI        | 220087                | 220166              |
| iYPL154C       | 1612                                              | XVI        | 260930                | 261726              |
| iYPL152W       | 1613                                              | XVI        | 266103                | 266179              |
| iYPL140C       | 1614                                              | XVI        | 289033                | 289668              |
| iYPL131W       | 1615                                              | XVI        | 304013                | 304386              |
| YPL124W        | 1616                                              | XVI        | 316754                | 317515              |
| iYPL116W       | 1617                                              | XVI        | 331698                | 332099              |
| iYPL087W       | 1618                                              | XVI        | 384403                | 384768              |
| iYPL074W       | 1619                                              | XVI        | 418022                | 418494              |
| iYPL070W       | 1620                                              | XVI        | 422781                | 422880              |
| iYPL021W       | 1621                                              | XVI        | 511660                | 512309              |
| iYPR003C       | 1622                                              | XVI        | 563763                | 564002              |
| iYPR031W       | 1623                                              | XVI        | 633756                | 634118              |
| iYPR068C       | 1624                                              | XVI        | 684348                | 684551              |
| iYPR074C       | 1625                                              | XVI        | 694833                | 695732              |
| iYPR111W       | 1626                                              | XVI        | 748997                | 749253              |
| iYPR143W       | 1627                                              | XVI        | 819070                | 819524              |

**Supplementary Table I.** Continued from previous page.

| <b>Gene ID</b> | <b>proARS/<br/>Inter-origin locus<sup>a</sup></b> | <b>Chr</b> | <b>Start<br/>(bp)</b> | <b>End<br/>(bp)</b> |
|----------------|---------------------------------------------------|------------|-----------------------|---------------------|
| iYPR157W       | 1628                                              | XVI        | 842664                | 843257              |
| iYPRCdelta22   | 1629                                              | XVI        | 850507                | 850624              |
| iYPRWsigma4    | 1630                                              | XVI        | 880721                | 881482              |
| iYPRWtau4      | 1631                                              | XVI        | 933399                | 933893              |
| iYPR201W-1     | 1632                                              | XVI        | 942079                | 943027              |

<sup>a</sup>The table lists the chromosomal coordinates and gene IDs of potential replication origins (pro-ARSs) and inter-origin loci. “Early/Early”, “Early/Late” or “Late/Late” was assigned to the inter-origin loci based on the replication times (Raghuraman *et al*, 2001) of the two pro-ARSs that flank these regions. Names of known ARSs are indicated in parentheses next to the pro-ARS name. The positive sign (+) next to the pro-ARSs on chromosome X indicates that these ARSs tested positive in an ARS assay (Wyrick *et al*, 2001).

<sup>b</sup>Inter-origin loci (negative controls) used for normalization.

**Supplementary Table II.** Origins activated in wild-type cells.

| <b>Chr</b>  | <b>80 min in HU (Total 66)<sup>a</sup></b> | <b>120 min in HU (Total 180)<sup>a</sup></b>                                                                  |
|-------------|--------------------------------------------|---------------------------------------------------------------------------------------------------------------|
| <b>I</b>    | -                                          | 108,109                                                                                                       |
| <b>II</b>   | 208,212                                    | 202,208,209,212,213,215,220,221,228                                                                           |
| <b>III</b>  | 305,306,310,315                            | 304,305,306,307,309,310,313,315                                                                               |
| <b>IV</b>   | 409,410,411,416,417,418                    | 406,409,411,412,413,414,415,416,417,418,419,420,425,427,429,432,435,436,439,442                               |
| <b>V</b>    | 508                                        | 502,508,510,511,514,516,517,518,519,520                                                                       |
| <b>VI</b>   | 606                                        | 605,606,607,610                                                                                               |
| <b>VII</b>  | 710,712,717,718,721,722,724,728            | 709,710,712,714,715,717,718,719,720,721,722,723,724,728,729,733,735,734,736                                   |
| <b>VIII</b> | 806,809,818                                | 801,802,805,806,807,808,809,810,811,814,815,818,824                                                           |
| <b>IX</b>   | 904,909,910,918,919,920                    | 902,909,913,914,915,918,919,920,921,922                                                                       |
| <b>X</b>    | 1008,1012,1014,1021                        | 1003,1004,1008,1009,1012,1013,1014,1018,1019,1021                                                             |
| <b>XI</b>   | 1104,1114,1116                             | 1102,1103,1106,1114,1115                                                                                      |
| <b>XII</b>  | 1213,1214,1215,1227,1230,1232              | 1202,1207,1213,1214,1215,1216,1217,1218,1219,1220,1221,1223,1228,1230,1232,1233                               |
| <b>XIII</b> | 1304,1305,1308,1309,1310,1319,1329         | 1303,1304,1305,1307,1308,1309,1310,1316,1317,1319,1320,1321,1322,1323,1324,1325,1329,1330,1331,1332,1333,1335 |
| <b>XIV</b>  | 1407,1412,1416,1419,1426                   | 1401,1409,1410,1411,1415,1416,1421,1423,1424,1425,1426                                                        |
| <b>XV</b>   | 1510,1511,1512,1513,1514,1524,1528         | 1509,1510,1511,1512,1513,1514,1517,1518,1529                                                                  |
| <b>XVI</b>  | 1608,1622,1629                             | 1603,1605,1608,1611,1612,1614,1617,1619,1620,1622,1626,1629,1632                                              |

<sup>a</sup>Replication origins with a copy number change above significance level 1 (one standard deviation above background) and a p-value < 0.05 were considered activated.

**Supplementary Table III.** List of all origins activated in *mecI-1* cells.

| <b>Chr</b> | <b>Activated origins<sup>a</sup></b>                                                               |
|------------|----------------------------------------------------------------------------------------------------|
| I          | 102,108,111                                                                                        |
| II         | 201,210,211,212,213,223,224,225                                                                    |
| III        | 301,303/320,304,305,306,313,316,318                                                                |
| IV         | 406,407,410,411,413,416,417,418,419,421,422,423,424,426,432,438,443,445                            |
| V          | 503,505,507,508,509,510,523                                                                        |
| VI         | 600.1,600.2,600.4,607,608,609,610                                                                  |
| VII        | 705,706,707,708,709,710,711,712,713,715,717,719,721,722,724,725,726,727,733,734,736                |
| VIII       | 802,808,809,814,815,817,821,823,824                                                                |
| IX         | 902,903,904,905,906,910,913,914,917,918,919,920,922                                                |
| X          | 1001,1004,1007,1009,1010,1011,1014,1018,1021,1023                                                  |
| XI         | 1104,1105,1113,1114,1115,1116,1117,1118,1120,1121,1122,1123,1124                                   |
| XII        | 1204,1206,1212,1213,1214,1215,1218,1219,1221,1224,1225,1227,1228,1230,<br>1231,1232,1233,1236,1237 |
| XIII       | 1302,1303,1304,1306,1307,1308,1310,1311,1316,1320,1321,1322,1324,1328,<br>1330,1331,1334,1335      |
| XIV        | 1406,1412,1413,1417,1418,1419,1421,1425,1427,1430                                                  |
| XV         | 1503,1504,1505,1509,1511,1513,1514,1515,1516,1517,1518,1522,1524,1528,1529                         |
| XVI        | 1604,1605,1606,1609,1610,1611,1612,1617,1620,1621,1622,1626,1629,1630,1631,1632                    |

<sup>a</sup>Replication origins with a copy number change above significance level 1 (one standard deviation above background) and a p-value < 0.05 were considered activated.

**Supplementary Table IV.** List of all origins activated in *rad53-1* cells.

| <b>Chr</b> | <b>Activated origins<sup>a</sup></b>                                                                                                  |
|------------|---------------------------------------------------------------------------------------------------------------------------------------|
| I          | 102,108,110,111                                                                                                                       |
| II         | 201,203,212,213,214,218,219,224,225,226,227                                                                                           |
| III        | 300.5,301,302,303/320,305,306,313,314,316,318                                                                                         |
| IV         | 405,406,407,408,409,410,411,412,413,416,418,419,420,424,426,431,432,434,436,438,<br>442,443,444,445,446,447,448                       |
| V          | 502,503,504,505,506,507,508,509,510,511,513,515,516,517,518,519,520,521,522(501),523                                                  |
| VI         | 600.1/120,600.2,600.3,600.4,603.5,607,608,609,610                                                                                     |
| VII        | 702,704,705,706,707,708,709,710,711,712,714,715,716,717,718,719,720,721,722,724,725,<br>726,727,728,731,732,733,734                   |
| VIII       | 801,802,803,804,807,808,809,811,813,815,816,817,818,819,820,821,822,823,824                                                           |
| IX         | 902,903,904,905,906,907,908,910,914,918,919,920                                                                                       |
| X          | 1004,1005,1008,1009,1010,1011,1012,1013,1014,1015,1018,1021,1022,1023                                                                 |
| XI         | 1101,1103,1104,1105,1107,1109,1110,1111,1113,1114,1115,1116,1117,1118,1119,1123,<br>1120,1124                                         |
| XII        | 1201,1202,1204,1205,1206,1208,1209,1212,1213,1214,1215,1216,1218,1219,1220,1221,<br>1225,1226,1227,1229,1230,1231,1233,1236           |
| XIII       | 1301,1302,1303,1304,1306,1310,1311,1312,1313,1314,1315,1316,1318,1319,1322,1323,<br>1324,1325,1326,1327,1328,1329,1330,1333,1334,1335 |
| XIV        | 1402,1403,1404,1406,1407,1408,1410,1411,1412,1415,1416,1417,1418,1419,1420,<br>1421,1422,1423,1424,1426,1427,1428,1429,1430           |
| XV         | 1503,1504,1505,1509,1510,1511,1512,1513,1515,1516,1517,1518,1522,1525,1526,<br>1527,1528,1529,1530                                    |
| XVI        | 1605,1608,1609,1610,1619,1620,1626,1630,1631,1632                                                                                     |

<sup>a</sup>Replication origins with a copy number change above significance level 1 (one standard deviation above background) and a p-value < 0.05 were considered activated.

**Supplementary Table V.** List of tRNA genes, Ty elements and centromeres in the yeast strain S288C that lie within 10 kb of a compromised early origin.

| <b>ARS</b>  |                   |                 | <b>Feature<sup>a</sup></b> |                   |                 |                             |
|-------------|-------------------|-----------------|----------------------------|-------------------|-----------------|-----------------------------|
| <b>Name</b> | <b>Start (bp)</b> | <b>End (bp)</b> | <b>Name</b>                | <b>Start (bp)</b> | <b>End (bp)</b> | <b>Distance to ARS (kb)</b> |
| 208         | 237425            | 238165          | tRNA                       | 227078            | 227159          | 10.00                       |
|             |                   |                 | Centromere                 | 238209            | 238325          | 0.04                        |
| 310         | 166050            | 167084          | tRNA                       | 168296            | 168367          | 1.21                        |
|             |                   |                 | Ty1 LTR                    | 169568            | 169883          | 2.48                        |
| 315         | 223463            | 224292          | tRNA                       | 227937            | 228037          | 3.65                        |
| 606         | 167517            | 167880          | tRNA                       | 167430            | 167518          | 0.00                        |
| 718         | 420552            | 421820          | tRNA                       | 423098            | 423211          | 1.28                        |
| 728         | 713976            | 714879          | Ty3 LTR                    | 712210            | 712549          | 1.43                        |
|             |                   |                 | Ty1 LTR                    | 713388            | 713088          | 0.89                        |
| 806         | 116172            | 116414          | tRNA                       | 116173            | 116101          | 0.00                        |
|             |                   |                 | Ty1 LTR                    | 116746            | 116415          | 0.00                        |
| 909         | 105676            | 106107          | -                          |                   |                 |                             |
| 1305        | 94602             | 95145           | -                          |                   |                 |                             |
| 1319        | 503388            | 503770          | Ty1 LTR                    | 503191            | 503388          | 0.00                        |
|             |                   |                 | Ty4 LTR                    | 503770            | 504140          | 0.00                        |
|             |                   |                 | Ty1 LTR                    | 504345            | 504676          | 0.58                        |
|             |                   |                 | tRNA-Leu                   | 504894            | 505007          | 1.12                        |
| 1407        | 89517             | 90301           | -                          |                   |                 |                             |
| 1416        | 325051            | 325264          | -                          |                   |                 |                             |
| 1426        | 635296            | 635942          | tRNA-Pro                   | 631917            | 631846          | 3.45                        |
|             |                   |                 | Ty1 LTR                    | 632114            | 631998          | 3.30                        |
|             |                   |                 | Ty4 LTR                    | 632489            | 632119          | 3.18                        |
|             |                   |                 | tRNA-Asn                   | 632599            | 632672          | 2.62                        |
| 1510        | 166951            | 167838          | -                          |                   |                 |                             |



**Supplementary Table V.** Continued from previous page.

| <b>ARS</b>  |                   |                 | <b>Feature<sup>a</sup></b> |                   |                 |                             |
|-------------|-------------------|-----------------|----------------------------|-------------------|-----------------|-----------------------------|
| <b>Name</b> | <b>Start (bp)</b> | <b>End (bp)</b> | <b>Name</b>                | <b>Start (bp)</b> | <b>End (bp)</b> | <b>Distance to ARS (kb)</b> |
| 1512        | 309359            | 309925          | tRNA-Pro                   | 301097            | 301198          | 8.16                        |
|             |                   |                 | Centromere                 | 326702            | 326584          | 16.78                       |
| 1622        | 563763            | 564002          | tRNA-Phe                   | 560286            | 560195          | 3.48                        |
|             |                   |                 | Ty1 LTR                    | 560478            | 560809          | 3.29                        |
| 1629        | 850507            | 850624          | Full length Ty1            | 844408            | 850336          | 0.17                        |
|             |                   |                 | Ty1 LTR                    | 844408            | 844745          | 5.76                        |
|             |                   |                 | Ty1 LTR                    | 849999            | 850336          | 0.17                        |
|             |                   |                 | Ty1 LTR                    | 850508            | 850353          | 0.00                        |
|             |                   |                 | Ty1 LTR                    | 850962            | 850625          | 0.00                        |
|             |                   |                 | Ty3 LTR                    | 856541            | 856881          | 5.92                        |
|             |                   |                 | Full length Ty1            | 856550            | 850625          | 0.00                        |
|             |                   |                 | Ty1 LTR                    | 856550            | 856213          | 5.59                        |
|             |                   |                 | tRNA-Ala                   | 856898            | 856970          | 6.27                        |

<sup>a</sup>Based on data from the *Saccharomyces* Genome Database (<http://www.yeastgenome.org/>).

**Supplementary Table VI.** Summary of the total percentages of activated origins and compromised early origins that lie within 10 kb of a tRNA and/or Ty element in the yeast strain S288C.

---

| <b>Origin group</b>       | <b>% of origins<sup>a</sup></b> |
|---------------------------|---------------------------------|
| All activated origins     | 34                              |
| Activated early origins   | 44                              |
| Activated late origins    | 25                              |
| Compromised early origins | 71                              |

---

<sup>a</sup>Based on data from the *Saccharomyces* Genome Database (<http://www.yeastgenome.org/>).
